# Supplementary material for: Rotavirus Vaccination and the Global Burden of Rotavirus Diarrhea Among Children Younger Than 5 Years
Source: PubMed Central journal article supplement (PMC6233802; doi:10.1001/jamapediatrics.2018.1960), 2018-08-13

## Supplementary Online Content

Troeger C, Khalil IA, Rao PC, et al. Rotavirus Vaccination and the Global Burden of Rotavirus Diarrhea Among Children Younger Than 5 Years. *JAMA Pediatr.* Published online August 13, 2018. doi:10.1001/jamapediatrics.2018.1960

Supplement. eTable 1. Covariates used in GBD 2016 diarrhea modeling

eTable 2. The association between rotavirus detection and diarrhea case status

eTable 3. Data points used for rotavirus proportion modeling by country and source population

eTable 4. Deaths, mortality rate per 100,000, incidence per 1000, and number of cases due to rotavirus in 2016 among children under 5

eTable 5. Deaths averted due to the rotavirus vaccine and remaining avertable deaths if vaccine coverage were 100% in 2016 by GBD region and country

eFigure 1. Data coverage maps

eFigure 2. Diagnostic ability to discriminate cases and controls of qPCR

eFigure 3. Modeled rotavirus vaccine coverage among children under 5 in 2016

eFigure 4. Modeled number of under 5 deaths averted due to rotavirus vaccine in 2016

eFigure 5. A comparison of the number of deaths and PAFs due to rotaviral diarrhea in GBD 2015 and GBD 2016 in all ages and children under-5

eFigure 6. Visualizing uncertainty around PAF estimates

This supplementary material has been provided by the authors to give readers additional information about their work.

### **eTable 1. Covariates used in GBD 2016 diarrhea modeling.**

Level is ranked from 1 (causally related) to 3 (distally related). Direction is the required negative or positive association with diarrhea mortality.

| Covariate                                | Level | Direction |
|------------------------------------------|-------|-----------|
| Diarrhea Summary Exposure Variable (SEV) | 1     | +         |
| Height for age <2 SD                     | 1     | +         |
| Sanitation SEV                           | 1     | +         |

|                                     |   |   |
|-------------------------------------|---|---|
| Water SEV                           | 1 | + |
| Weight for age <2 SD                | 1 | + |
| Weight for height <2 SD             | 1 | + |
| Handwashing                         | 1 | - |
| Rotavirus vaccine                   | 1 | - |
| Safe sanitation                     | 1 | - |
| Safe water                          | 1 | - |
| Breastfeeding SEV                   | 2 | + |
| Vitamin A deficiency                | 2 | + |
| Zinc deficiency                     | 2 | + |
| Healthcare access and quality index | 2 | - |
| LDI per Capita                      | 3 | - |
| Maternal education per capita       | 3 | - |
| Socio-demographic index             | 3 | - |
| Population <150/km <sup>2</sup>     | 3 | 0 |
| Population >1000/km <sup>2</sup>    | 3 | 0 |

**eTable 2. The association between rotavirus detection and diarrhea case status.**

The odds ratios of diarrhea given the presence of rotavirus in a stool sample, based on a molecular diagnostic case definition, is shown for the two age groups used in this study.

| <b>Age</b> | <b>Odds ratio<br/>(95% CI)</b> |
|------------|--------------------------------|
| Under 1    | 15.4<br>(9.9-23.1)             |
| Over 1     | 14.1<br>(7.4-25.7)             |

**eTable 3. Data points used for rotavirus proportion modeling by country and source population.**

| Location                         | iso3 Code | Data points | Inpatient population | Rotavirus exclusive testing | New for GBD 2016 |
|----------------------------------|-----------|-------------|----------------------|-----------------------------|------------------|
| Angola                           | AGO       | 2           | 1                    | 0                           | 2                |
| Albania                          | ALB       | 6           | 5                    | 0                           | 6                |
| Argentina                        | ARG       | 22          | 19                   | 22                          | 0                |
| Australia                        | AUS       | 24          | 9                    | 0                           | 0                |
| Austria                          | AUT       | 2           | 0                    | 0                           | 1                |
| Belgium                          | BEL       | 14          | 14                   | 7                           | 0                |
| Burkina Faso                     | BFA       | 17          | 8                    | 5                           | 5                |
| Bangladesh                       | BGD       | 98          | 48                   | 41                          | 1                |
| Bulgaria                         | BGR       | 8           | 8                    | 0                           | 0                |
| Bosnia and Herzegovina           | BIH       | 5           | 5                    | 0                           | 1                |
| Bolivia                          | BOL       | 3           | 3                    | 0                           | 2                |
| Brazil                           | BRA       | 141         | 93                   | 87                          | 6                |
| Botswana                         | BWA       | 17          | 10                   | 12                          | 0                |
| Central African Republic         | CAF       | 11          | 7                    | 8                           | 3                |
| Switzerland                      | CHE       | 1           | 1                    | 0                           | 1                |
| Chile                            | CHL       | 12          | 9                    | 0                           | 0                |
| China                            | CHN       | 94          | 42                   | 29                          | 12               |
| Cote d'Ivoire                    | CIV       | 4           | 4                    | 4                           | 0                |
| Cameroon                         | CMR       | 29          | 7                    | 15                          | 0                |
| Democratic Republic of the Congo | COD       | 11          | 0                    | 6                           | 0                |
| Congo                            | COG       | 7           | 0                    | 7                           | 0                |
| Colombia                         | COL       | 8           | 0                    | 0                           | 4                |
| Cuba                             | CUB       | 4           | 4                    | 4                           | 0                |
| Germany                          | DEU       | 20          | 16                   | 14                          | 1                |
| Denmark                          | DNK       | 3           | 0                    | 3                           | 0                |
| Ecuador                          | ECU       | 1           | 0                    | 0                           | 0                |
| Egypt                            | EGY       | 20          | 1                    | 0                           | 0                |
| England                          | ENG       | 3           | 0                    | 0                           | 0                |
| Spain                            | ESP       | 85          | 74                   | 47                          | 1                |
| Estonia                          | EST       | 3           | 3                    | 2                           | 0                |
| Ethiopia                         | ETH       | 9           | 8                    | 8                           | 0                |
| Finland                          | FIN       | 7           | 3                    | 0                           | 1                |
| Fiji                             | FJI       | 9           | 9                    | 0                           | 0                |
| France                           | FRA       | 16          | 14                   | 7                           | 1                |
| Gabon                            | GAB       | 2           | 0                    | 0                           | 2                |
| Ghana                            | GHA       | 42          | 1                    | 17                          | 1                |
| The Gambia                       | GMB       | 21          | 9                    | 6                           | 0                |

| <b>Location</b> | <b>iso3 Code</b> | <b>Data points</b> | <b>Inpatient population</b> | <b>Rotavirus exclusive testing</b> | <b>New for GBD 2016</b> |
|-----------------|------------------|--------------------|-----------------------------|------------------------------------|-------------------------|
| Guinea-Bissau   | GNB              | 5                  | 5                           | 5                                  | 0                       |
| Greece          | GRC              | 8                  | 2                           | 5                                  | 1                       |
| Guatemala       | GTM              | 25                 | 10                          | 8                                  | 3                       |
| Guyana          | GUY              | 1                  | 1                           | 0                                  | 0                       |
| Honduras        | HND              | 2                  | 1                           | 0                                  | 0                       |
| Haiti           | HTI              | 11                 | 11                          | 0                                  | 0                       |
| Hungary         | HUN              | 13                 | 13                          | 13                                 | 0                       |
| Indonesia       | IDN              | 30                 | 19                          | 8                                  | 7                       |
| India           | IND              | 191                | 87                          | 146                                | 48                      |
| Ireland         | IRL              | 1                  | 0                           | 0                                  | 1                       |
| Iran            | IRN              | 7                  | 6                           | 0                                  | 0                       |
| Iceland         | ISL              | 7                  | 0                           | 0                                  | 0                       |
| Israel          | ISR              | 3                  | 2                           | 2                                  | 0                       |
| Italy           | ITA              | 32                 | 23                          | 7                                  | 3                       |
| Jordan          | JOR              | 2                  | 2                           | 0                                  | 0                       |
| Japan           | JPN              | 25                 | 2                           | 16                                 | 7                       |
| Kazakhstan      | KAZ              | 13                 | 13                          | 13                                 | 0                       |
| Kenya           | KEN              | 88                 | 18                          | 58                                 | 0                       |
| Kyrgyzstan      | KGZ              | 21                 | 21                          | 15                                 | 0                       |
| Cambodia        | KHM              | 9                  | 8                           | 7                                  | 0                       |
| South Korea     | KOR              | 54                 | 48                          | 45                                 | 0                       |
| Laos            | LAO              | 8                  | 5                           | 0                                  | 0                       |
| Libya           | LBY              | 5                  | 4                           | 0                                  | 2                       |
| Sri Lanka       | LKA              | 1                  | 1                           | 0                                  | 1                       |
| Morocco         | MAR              | 9                  | 9                           | 5                                  | 0                       |
| Madagascar      | MDG              | 8                  | 1                           | 8                                  | 0                       |
| Mali            | MLI              | 17                 | 9                           | 1                                  | 0                       |
| Mongolia        | MNG              | 2                  | 2                           | 0                                  | 2                       |
| Mozambique      | MOZ              | 18                 | 9                           | 0                                  | 3                       |
| Mauritius       | MUS              | 7                  | 0                           | 7                                  | 0                       |
| Malawi          | MWI              | 4                  | 1                           | 3                                  | 0                       |
| Malaysia        | MYS              | 2                  | 1                           | 1                                  | 0                       |
| Namibia         | NAM              | 10                 | 0                           | 10                                 | 10                      |
| Niger           | NER              | 1                  | 0                           | 0                                  | 0                       |
| Nigeria         | NGA              | 43                 | 2                           | 32                                 | 23                      |
| Nicaragua       | NIC              | 12                 | 0                           | 1                                  | 3                       |
| Netherlands     | NLD              | 5                  | 5                           | 0                                  | 0                       |
| Nepal           | NPL              | 65                 | 18                          | 32                                 | 1                       |
| Oman            | OMN              | 2                  | 2                           | 0                                  | 0                       |

| <b>Location</b>                  | <b>iso3 Code</b> | <b>Data points</b> | <b>Inpatient population</b> | <b>Rotavirus exclusive testing</b> | <b>New for GBD 2016</b> |
|----------------------------------|------------------|--------------------|-----------------------------|------------------------------------|-------------------------|
| Pakistan                         | PAK              | 33                 | 24                          | 15                                 | 0                       |
| Peru                             | PER              | 22                 | 7                           | 3                                  | 3                       |
| Philippines                      | PHL              | 9                  | 9                           | 8                                  | 0                       |
| Papua New Guinea                 | PNG              | 6                  | 6                           | 0                                  | 0                       |
| Poland                           | POL              | 12                 | 2                           | 6                                  | 0                       |
| Portugal                         | PRT              | 1                  | 0                           | 0                                  | 1                       |
| Paraguay                         | PRY              | 19                 | 19                          | 18                                 | 0                       |
| Western Europe                   | R10              | 3                  | 0                           | 0                                  | 3                       |
| Southern Sub-Saharan Africa      | R20              | 1                  | 0                           | 1                                  | 0                       |
| Romania                          | ROU              | 4                  | 3                           | 0                                  | 1                       |
| Russia                           | RUS              | 7                  | 7                           | 0                                  | 0                       |
| Rwanda                           | RWA              | 1                  | 0                           | 0                                  | 0                       |
| Saudi Arabia                     | SAU              | 8                  | 3                           | 4                                  | 1                       |
| Sudan                            | SDN              | 4                  | 0                           | 1                                  | 0                       |
| Senegal                          | SEN              | 4                  | 1                           | 0                                  | 0                       |
| Singapore                        | SGP              | 10                 | 9                           | 0                                  | 1                       |
| El Salvador                      | SLV              | 3                  | 3                           | 1                                  | 0                       |
| Suriname                         | SUR              | 1                  | 1                           | 0                                  | 0                       |
| Sweden                           | SWE              | 8                  | 8                           | 7                                  | 0                       |
| Togo                             | TGO              | 1                  | 0                           | 1                                  | 0                       |
| Thailand                         | THA              | 39                 | 18                          | 2                                  | 1                       |
| Tunisia                          | TUN              | 16                 | 15                          | 13                                 | 0                       |
| Turkey                           | TUR              | 20                 | 13                          | 6                                  | 4                       |
| Taiwan                           | TWN              | 2                  | 2                           | 0                                  | 0                       |
| Tanzania                         | TZA              | 7                  | 0                           | 1                                  | 1                       |
| Uganda                           | UGA              | 25                 | 24                          | 6                                  | 6                       |
| North East England               | UKC              | 16                 | 16                          | 0                                  | 0                       |
| North West England               | UKD              | 25                 | 24                          | 8                                  | 0                       |
| Yorkshire and the Humber         | UKE              | 18                 | 18                          | 0                                  | 0                       |
| East Midlands                    | UKF              | 11                 | 11                          | 0                                  | 0                       |
| West Midlands                    | UKG              | 18                 | 17                          | 0                                  | 0                       |
| East of England                  | UKH              | 16                 | 16                          | 0                                  | 0                       |
| Greater London                   | UKI              | 18                 | 18                          | 0                                  | 0                       |
| South East England               | UKJ              | 12                 | 12                          | 0                                  | 0                       |
| South West England               | UKK              | 14                 | 14                          | 0                                  | 0                       |
| United States                    | USA              | 26                 | 9                           | 0                                  | 8                       |
| Uzbekistan                       | UZB              | 18                 | 18                          | 15                                 | 0                       |
| Saint Vincent and the Grenadines | VCT              | 1                  | 1                           | 0                                  | 0                       |
| Venezuela                        | VEN              | 15                 | 4                           | 7                                  | 0                       |

| <b>Location</b> | <b>iso3 Code</b> | <b>Data points</b> | <b>Inpatient population</b> | <b>Rotavirus exclusive testing</b> | <b>New for GBD 2016</b> |
|-----------------|------------------|--------------------|-----------------------------|------------------------------------|-------------------------|
| Vietnam         | VNM              | 27                 | 21                          | 7                                  | 0                       |
| South Africa    | ZAF              | 19                 | 15                          | 16                                 | 0                       |
| Zambia          | ZMB              | 10                 | 9                           | 9                                  | 9                       |
| Zimbabwe        | ZWE              | 13                 | 12                          | 12                                 | 0                       |

**eTable 4. Deaths, mortality rate per 100,000, incidence per 1000, and number of cases due to rotavirus in 2016 among children under 5.**

| Location                                      | Deaths<br>(95% UI)                        | Mortality rate per<br>100,000<br>(95% UI) | Incidence per<br>1,000<br>(95% UI) | Cases<br>(95% UI)                                     |
|-----------------------------------------------|-------------------------------------------|-------------------------------------------|------------------------------------|-------------------------------------------------------|
| <b>Global</b>                                 | <b>128,530<br/>(104,496-<br/>155,648)</b> | <b>20.3<br/>(16.5-24.6)</b>               | <b>401.3<br/>(300.3-529.5)</b>     | <b>258,173,278<br/>(193,195,064-<br/>340,672,879)</b> |
| <b>Southeast Asia, East Asia, and Oceania</b> | <b>4,499<br/>(3,498-5,613)</b>            | <b>3.7<br/>(2.8-4.6)</b>                  | <b>305.5<br/>(217.3-425.5)</b>     | <b>38,563,330<br/>(27,422,172-53,703,367)</b>         |
| <b>East Asia</b>                              | <b>649<br/>(478-880)</b>                  | <b>1.0<br/>(0.7-1.4)</b>                  | <b>125.3<br/>(85.4-183.7)</b>      | <b>8,280,369<br/>(5,643,598-12,134,956)</b>           |
| China                                         | 474<br>(363-621)                          | 0.8<br>(0.6-1.0)                          | 111.1<br>(76.7-161.2)              | 6,862,616<br>(4,736,201-9,951,575)                    |
| North Korea                                   | 173<br>(82-310)                           | 5.8<br>(2.8-10.5)                         | 370.0<br>(235.0-546.0)             | 1,214,987<br>(771,802-1,792,896)                      |
| Taiwan                                        | 2<br>(1-3)                                | 0.2<br>(0.1-0.3)                          | 194.3<br>(116.3-304.4)             | 202,885<br>(121,429-317,854)                          |
| <b>Southeast Asia</b>                         | <b>3,765<br/>(2,895-4,789)</b>            | <b>6.6<br/>(5.1-8.4)</b>                  | <b>507.9<br/>(360.5-706.1)</b>     | <b>29,845,328<br/>(21,186,178-41,494,613)</b>         |
| Cambodia                                      | 96<br>(55-158)                            | 5.1<br>(2.9-8.4)                          | 667.9<br>(453.8-921.4)             | 1,223,928<br>(831,622-1,688,584)                      |
| Indonesia                                     | 1,994<br>(1,498-2,611)                    | 8.8<br>(6.6-11.5)                         | 538.7<br>(369.3-776.0)             | 12,948,711<br>(8,878,371-18,654,115)                  |
| Laos                                          | 329<br>(139-622)                          | 29.1<br>(12.3-55.0)                       | 833.1<br>(569.3-1,158.0)           | 899,194<br>(614,471-1,249,885)                        |
| Malaysia                                      | 7<br>(5-12)                               | 0.3<br>(0.2-0.5)                          | 222.5<br>(126.0-357.7)             | 579,057<br>(328,009-931,153)                          |
| Maldives                                      | 0<br>(0-0)                                | 0.4<br>(0.3-0.7)                          | 258.1<br>(164.9-396.8)             | 9,512<br>(6,076-14,621)                               |
| Mauritius                                     | 1<br>(1-2)                                | 1.7<br>(1.1-2.5)                          | 374.8<br>(240.1-574.2)             | 24,854<br>(15,923-38,074)                             |
| Myanmar                                       | 324<br>(148-609)                          | 7.0<br>(3.2-13.1)                         | 334.7<br>(214.7-499.9)             | 2,093,714<br>(1,343,046-3,127,199)                    |
| Philippines                                   | 887<br>(558-1,382)                        | 7.7<br>(4.8-11.9)                         | 507.3<br>(390.2-671.1)             | 5,868,418<br>(4,514,026-7,763,542)                    |
| Sri Lanka                                     | 3<br>(2-6)                                | 0.2<br>(0.1-0.4)                          | 234.7<br>(147.8-358.6)             | 326,929<br>(205,905-499,533)                          |



| Location                                                | Deaths<br>(95% UI)       | Mortality rate per<br>100,000<br>(95% UI) | Incidence per<br>1,000<br>(95% UI) | Cases<br>(95% UI)                            |
|---------------------------------------------------------|--------------------------|-------------------------------------------|------------------------------------|----------------------------------------------|
| Seychelles                                              | 0<br>(0-0)               | 0.4<br>(0.2-0.6)                          | 351.8<br>(214.7-545.7)             | 2,955<br>(1,804-4,584)                       |
| Thailand                                                | 25<br>(15-39)            | 0.8<br>(0.5-1.3)                          | 487.9<br>(366.5-664.4)             | 1,220,322<br>(916,601-1,661,770)             |
| Timor-Leste                                             | 54<br>(27-98)            | 32.5<br>(16.1-59.0)                       | 734.8<br>(482.6-1,108.8)           | 120,817<br>(79,346-182,321)                  |
| Vietnam                                                 | 44<br>(25-73)            | 0.6<br>(0.3-1.0)                          | 630.3<br>(422.7-909.1)             | 4,510,324<br>(3,024,761-6,505,488)           |
| <b>Oceania</b>                                          | <b>85<br/>(44-153)</b>   | <b>6.0<br/>(3.1-10.8)</b>                 | <b>324.9<br/>(208.3-487.1)</b>     | <b>448,623<br/>(287,666-672,555)</b>         |
| American Samoa                                          | 0<br>(0-0)               | 0.5<br>(0.3-0.9)                          | 276.8<br>(178.5-417.4)             | 2,069<br>(1,334-3,120)                       |
| Federated States of Micronesia                          | 0<br>(0-0)               | 0.8<br>(0.3-1.5)                          | 221.5<br>(140.9-332.2)             | 2,189<br>(1,393-3,283)                       |
| Fiji                                                    | 4<br>(2-7)               | 7.0<br>(3.3-13.6)                         | 311.2<br>(201.7-469.3)             | 16,951<br>(10,987-25,560)                    |
| Guam                                                    | 0<br>(0-0)               | 0.2<br>(0.1-0.4)                          | 283.8<br>(181.6-433.6)             | 4,960<br>(3,173-7,578)                       |
| Kiribati                                                | 1<br>(1-3)               | 11.0<br>(4.9-21.8)                        | 343.2<br>(217.2-528.1)             | 4,665<br>(2,953-7,178)                       |
| Marshall Islands                                        | 0<br>(0-0)               | 1.1<br>(0.4-2.3)                          | 262.8<br>(167.8-391.7)             | 2,582<br>(1,649-3,848)                       |
| Northern Mariana Islands                                | 0<br>(0-0)               | 0.1<br>(0.0-0.1)                          | 391.8<br>(244.9-619.4)             | 6,071<br>(3,794-9,598)                       |
| Papua New Guinea                                        | 72<br>(34-136)           | 6.7<br>(3.1-12.7)                         | 334.9<br>(213.8-505.2)             | 348,845<br>(222,664-526,294)                 |
| Samoa                                                   | 0<br>(0-0)               | 0.4<br>(0.1-0.8)                          | 301.7<br>(193.9-458.9)             | 8,333<br>(5,355-12,674)                      |
| Solomon Islands                                         | 5<br>(2-9)               | 6.0<br>(3.0-10.7)                         | 387.3<br>(254.0-575.1)             | 31,748<br>(20,827-47,144)                    |
| Tonga                                                   | 0<br>(0-0)               | 1.0<br>(0.4-2.0)                          | 283.5<br>(187.2-419.6)             | 3,880<br>(2,562-5,744)                       |
| Vanuatu                                                 | 2<br>(1-4)               | 5.0<br>(2.3-9.9)                          | 404.9<br>(266.9-596.1)             | 16,352<br>(10,778-24,071)                    |
| <b>Central Europe, Eastern Europe, and Central Asia</b> | <b>317<br/>(212-456)</b> | <b>1.1<br/>(0.8-1.6)</b>                  | <b>431.1<br/>(296.2-605.9)</b>     | <b>13,107,287<br/>(9,005,945-18,424,868)</b> |

| Location               | Deaths<br>(95% UI)       | Mortality rate per<br>100,000<br>(95% UI) | Incidence per<br>1,000<br>(95% UI) | Cases<br>(95% UI)                          |
|------------------------|--------------------------|-------------------------------------------|------------------------------------|--------------------------------------------|
| <b>Central Asia</b>    | <b>237<br/>(145-366)</b> | <b>2.5<br/>(1.5-3.8)</b>                  | <b>172.5<br/>(107.9-262.5)</b>     | <b>1,899,833<br/>(1,187,968-2,890,610)</b> |
| Armenia                | 1<br>(1-2)               | 0.5<br>(0.3-0.9)                          | 233.5<br>(143.5-358.7)             | 52,505<br>(32,270-80,674)                  |
| Azerbaijan             | 27<br>(13-50)            | 2.8<br>(1.3-5.2)                          | 303.6<br>(191.2-472.7)             | 281,222<br>(177,056-437,855)               |
| Georgia                | 1<br>(1-3)               | 0.4<br>(0.2-0.8)                          | 237.9<br>(144.1-368.0)             | 66,442<br>(40,234-102,773)                 |
| Kazakhstan             | 9<br>(5-15)              | 0.5<br>(0.3-0.8)                          | 180.9<br>(112.3-276.0)             | 353,358<br>(219,333-539,129)               |
| Kyrgyzstan             | 23<br>(15-34)            | 3.1<br>(2.0-4.5)                          | 140.6<br>(89.2-212.8)              | 114,018<br>(72,375-172,623)                |
| Mongolia               | 0<br>(0-1)               | 0.1<br>(0.1-0.2)                          | 354.2<br>(230.4-528.2)             | 131,766<br>(85,733-196,511)                |
| Tajikistan             | 143<br>(71-263)          | 12.6<br>(6.3-23.1)                        | 304.4<br>(193.4-470.2)             | 334,272<br>(212,342-516,351)               |
| Turkmenistan           | 17<br>(9-31)             | 3.0<br>(1.6-5.3)                          | 353.6<br>(220.1-547.5)             | 189,520<br>(117,974-293,444)               |
| Uzbekistan             | 15<br>(7-28)             | 0.4<br>(0.2-0.8)                          | 78.7<br>(45.8-125.4)               | 378,433<br>(220,172-603,296)               |
| <b>Central Europe</b>  | <b>24<br/>(19-32)</b>    | <b>0.4<br/>(0.3-0.6)</b>                  | <b>722.6<br/>(501.7-1,027.8)</b>   | <b>4,125,508<br/>(2,864,684-5,868,045)</b> |
| Albania                | 0<br>(0-0)               | 0.1<br>(0.1-0.3)                          | 337.0<br>(205.0-527.7)             | 58,485<br>(35,574-91,594)                  |
| Bosnia and Herzegovina | 1<br>(0-1)               | 0.4<br>(0.2-0.6)                          | 399.4<br>(253.4-593.6)             | 68,983<br>(43,757-102,511)                 |
| Bulgaria               | 2<br>(1-3)               | 0.5<br>(0.3-0.9)                          | 508.9<br>(320.1-781.3)             | 172,970<br>(108,794-265,566)               |
| Croatia                | 0<br>(0-0)               | 0.1<br>(0.1-0.2)                          | 682.4<br>(404.2-1,046.0)           | 135,746<br>(80,404-208,086)                |
| Czech Republic         | 1<br>(0-1)               | 0.1<br>(0.1-0.2)                          | 586.9<br>(356.8-915.0)             | 332,219<br>(201,976-517,954)               |
| Hungary                | 1<br>(0-1)               | 0.1<br>(0.1-0.2)                          | 275.5<br>(167.4-435.1)             | 140,202<br>(85,187-221,431)                |
| Macedonia              | 1<br>(0-1)               | 0.6<br>(0.3-1.2)                          | 434.0<br>(263.5-670.6)             | 49,436<br>(30,014-76,382)                  |

| Location                        | Deaths<br>(95% UI)       | Mortality rate per<br>100,000<br>(95% UI) | Incidence per<br>1,000<br>(95% UI) | Cases<br>(95% UI)                           |
|---------------------------------|--------------------------|-------------------------------------------|------------------------------------|---------------------------------------------|
| Montenegro                      | 0<br>(0-0)               | 0.2<br>(0.1-0.3)                          | 297.3<br>(178.6-466.9)             | 10,995<br>(6,604-17,267)                    |
| Poland                          | 2<br>(1-4)               | 0.1<br>(0.1-0.2)                          | 860.8<br>(585.8-1,268.7)           | 1,710,463<br>(1,164,102-2,520,923)          |
| Romania                         | 15<br>(10-22)            | 1.7<br>(1.2-2.5)                          | 1,186.8<br>(851.6-1,662.8)         | 945,983<br>(678,792-1,325,426)              |
| Serbia                          | 1<br>(1-2)               | 0.3<br>(0.2-0.5)                          | 540.5<br>(343.6-784.4)             | 221,879<br>(141,021-321,989)                |
| Slovakia                        | 1<br>(0-1)               | 0.3<br>(0.1-0.5)                          | 660.6<br>(384.2-1,053.4)           | 196,707<br>(114,399-313,656)                |
| Slovenia                        | 0<br>(0-0)               | 0.0<br>(0.0-0.1)                          | 704.6<br>(408.7-1,100.3)           | 74,920<br>(43,458-116,990)                  |
| <b>Eastern Europe</b>           | <b>55<br/>(36-78)</b>    | <b>0.4<br/>(0.3-0.6)</b>                  | <b>520.4<br/>(362.5-731.4)</b>     | <b>7,122,181<br/>(4,960,838-10,010,542)</b> |
| Belarus                         | 1<br>(0-1)               | 0.1<br>(0.0-0.1)                          | 400.4<br>(255.2-607.0)             | 239,056<br>(152,359-362,384)                |
| Estonia                         | 0<br>(0-0)               | 0.0<br>(0.0-0.1)                          | 499.5<br>(324.4-687.6)             | 38,355<br>(24,908-52,796)                   |
| Latvia                          | 0<br>(0-0)               | 0.1<br>(0.1-0.2)                          | 581.7<br>(368.8-856.4)             | 75,203<br>(47,675-110,715)                  |
| Lithuania                       | 0<br>(0-0)               | 0.1<br>(0.1-0.2)                          | 748.5<br>(479.0-1,096.7)           | 132,183<br>(84,590-193,677)                 |
| Moldova                         | 1<br>(1-2)               | 0.5<br>(0.3-0.8)                          | 325.4<br>(210.5-482.7)             | 72,542<br>(46,916-107,600)                  |
| Russia                          | 48<br>(31-71)            | 0.5<br>(0.3-0.8)                          | 532.6<br>(374.7-749.4)             | 5,262,797<br>(3,703,129-7,405,344)          |
| Ukraine                         | 5<br>(2-10)              | 0.2<br>(0.1-0.4)                          | 497.5<br>(318.4-730.1)             | 1,294,068<br>(828,264-1,899,123)            |
| <b>High-income</b>              | <b>134<br/>(109-164)</b> | <b>0.2<br/>(0.2-0.3)</b>                  | <b>118.8<br/>(81.0-171.7)</b>      | <b>6,903,717<br/>(4,707,088-9,978,464)</b>  |
| <b>High-income Asia Pacific</b> | <b>10<br/>(8-13)</b>     | <b>0.1<br/>(0.1-0.2)</b>                  | <b>33.0<br/>(20.7-49.9)</b>        | <b>251,204<br/>(157,464-379,899)</b>        |
| Brunei                          | 0<br>(0-0)               | 0.3<br>(0.2-0.4)                          | 35.8<br>(22.3-54.1)                | 1,251<br>(781-1,891)                        |
| Japan                           | 8<br>(6-10)              | 0.2<br>(0.1-0.2)                          | 36.1<br>(22.2-54.5)                | 187,285<br>(115,095-283,218)                |

| Location              | Deaths<br>(95% UI)    | Mortality rate per<br>100,000<br>(95% UI) | Incidence per<br>1,000<br>(95% UI) | Cases<br>(95% UI)                          |
|-----------------------|-----------------------|-------------------------------------------|------------------------------------|--------------------------------------------|
| South Korea           | 2<br>(1-3)            | 0.1<br>(0.1-0.1)                          | 24.0<br>(14.7-37.9)                | 53,115<br>(32,501-83,835)                  |
| Singapore             | 0<br>(0-0)            | 0.1<br>(0.1-0.2)                          | 53.6<br>(34.1-83.8)                | 9,503<br>(6,042-14,844)                    |
| Australasia           | 3<br>(2-4)            | 0.2<br>(0.1-0.2)                          | 34.3<br>(21.7-52.3)                | 62,334<br>(39,402-94,978)                  |
| Australia             | 2<br>(2-3)            | 0.2<br>(0.1-0.2)                          | 28.8<br>(18.0-44.2)                | 43,920<br>(27,465-67,236)                  |
| New Zealand           | 1<br>(0-1)            | 0.2<br>(0.2-0.3)                          | 62.9<br>(40.0-98.3)                | 18,410<br>(11,703-28,755)                  |
| <b>Western Europe</b> | <b>50<br/>(38-64)</b> | <b>0.2<br/>(0.2-0.3)</b>                  | <b>219.2<br/>(143.9-327.8)</b>     | <b>4,866,571<br/>(3,196,026-7,279,975)</b> |
| Andorra               | 0<br>(0-0)            | 0.2<br>(0.1-0.4)                          | 232.9<br>(126.3-404.5)             | 696<br>(378-1,209)                         |
| Austria               | 1<br>(0-1)            | 0.1<br>(0.1-0.2)                          | 270.5<br>(168.0-412.5)             | 106,729<br>(66,283-162,780)                |
| Belgium               | 2<br>(1-2)            | 0.3<br>(0.2-0.4)                          | 249.5<br>(152.1-386.4)             | 154,926<br>(94,413-239,902)                |
| Cyprus                | 0<br>(0-1)            | 0.6<br>(0.3-1.1)                          | 289.7<br>(158.6-505.6)             | 14,977<br>(8,200-26,140)                   |
| Denmark               | 2<br>(1-2)            | 0.5<br>(0.4-0.7)                          | 453.3<br>(287.4-691.8)             | 129,552<br>(82,133-197,739)                |
| England               | 5<br>(4-6)            | 0.1<br>(0.1-0.2)                          | 144.9<br>(91.9-222.3)              | 460,317<br>(291,777-706,061)               |
| Finland               | 0<br>(0-0)            | 0.1<br>(0.1-0.2)                          | 736.0<br>(470.1-1,088.9)           | 214,607<br>(137,076-317,524)               |
| France                | 18<br>(11-26)         | 0.5<br>(0.3-0.7)                          | 261.9<br>(166.5-409.1)             | 1,022,477<br>(649,967-1,597,211)           |
| Germany               | 6<br>(4-8)            | 0.2<br>(0.1-0.2)                          | 255.2<br>(157.9-392.2)             | 886,893<br>(548,805-1,362,736)             |
| Greece                | 0<br>(0-0)            | 0.0<br>(0.0-0.1)                          | 104.6<br>(61.5-169.3)              | 49,740<br>(29,254-80,517)                  |
| Iceland               | 0<br>(0-0)            | 0.1<br>(0.1-0.2)                          | 194.6<br>(118.5-306.5)             | 4,162<br>(2,535-6,554)                     |
| Ireland               | 0<br>(0-1)            | 0.1<br>(0.1-0.2)                          | 111.7<br>(61.7-191.3)              | 41,774<br>(23,074-71,545)                  |

| Location                         | Deaths<br>(95% UI)    | Mortality rate per<br>100,000<br>(95% UI) | Incidence per<br>1,000<br>(95% UI) | Cases<br>(95% UI)                        |
|----------------------------------|-----------------------|-------------------------------------------|------------------------------------|------------------------------------------|
| Israel                           | 3<br>(2-4)            | 0.4<br>(0.3-0.5)                          | 166.6<br>(117.3-246.5)             | 140,114<br>(98,615-207,280)              |
| Italy                            | 5<br>(3-7)            | 0.2<br>(0.1-0.3)                          | 212.7<br>(151.6-286.7)             | 572,733<br>(408,164-771,831)             |
| Luxembourg                       | 0<br>(0-0)            | 0.3<br>(0.2-0.5)                          | 240.1<br>(131.0-417.2)             | 6,992<br>(3,814-12,148)                  |
| Malta                            | 0<br>(0-0)            | 0.1<br>(0.1-0.2)                          | 95.4<br>(52.2-170.0)               | 2,028<br>(1,110-3,613)                   |
| Netherlands                      | 2<br>(1-3)            | 0.2<br>(0.1-0.3)                          | 428.5<br>(268.3-666.0)             | 372,773<br>(233,404-579,428)             |
| Northern Ireland                 | 1<br>(0-1)            | 0.4<br>(0.2-0.8)                          | 198.6<br>(107.5-356.0)             | 23,551<br>(12,748-42,224)                |
| Norway                           | 0<br>(0-1)            | 0.1<br>(0.1-0.2)                          | 212.9<br>(115.3-401.7)             | 60,285<br>(32,634-113,756)               |
| Portugal                         | 1<br>(1-2)            | 0.3<br>(0.2-0.5)                          | 163.9<br>(98.8-253.6)              | 75,773<br>(45,686-117,262)               |
| Scotland                         | 1<br>(1-2)            | 0.3<br>(0.2-0.5)                          | 193.5<br>(104.6-355.4)             | 52,705<br>(28,491-96,776)                |
| Spain                            | 1<br>(1-2)            | 0.1<br>(0.0-0.1)                          | 78.0<br>(52.8-115.5)               | 185,335<br>(125,338-274,381)             |
| Sweden                           | 1<br>(0-1)            | 0.1<br>(0.1-0.2)                          | 220.0<br>(137.7-339.9)             | 124,968<br>(78,254-193,095)              |
| Switzerland                      | 1<br>(1-2)            | 0.3<br>(0.2-0.4)                          | 273.2<br>(172.4-417.0)             | 113,167<br>(71,437-172,737)              |
| Wales                            | 1<br>(0-1)            | 0.5<br>(0.3-0.8)                          | 312.8<br>(170.2-560.4)             | 50,311<br>(27,373-90,124)                |
| <b>Southern Latin America</b>    | <b>33<br/>(25-43)</b> | <b>0.7<br/>(0.5-0.8)</b>                  | <b>224.0<br/>(166.3-301.5)</b>     | <b>1,121,370<br/>(832,556-1,509,433)</b> |
| Argentina                        | 28<br>(21-38)         | 0.8<br>(0.6-1.1)                          | 236.7<br>(178.9-313.1)             | 839,195<br>(634,190-1,110,080)           |
| Chile                            | 2<br>(2-4)            | 0.2<br>(0.1-0.3)                          | 211.3<br>(136.5-317.0)             | 257,959<br>(166,675-387,043)             |
| Uruguay                          | 2<br>(1-3)            | 0.8<br>(0.4-1.3)                          | 100.7<br>(62.2-161.3)              | 24,036<br>(14,838-38,513)                |
| <b>High-income North America</b> | <b>39<br/>(29-50)</b> | <b>0.2<br/>(0.1-0.2)</b>                  | <b>30.4<br/>(19.2-45.2)</b>        | <b>652,228<br/>(412,958-970,517)</b>     |

| Location                           | Deaths<br>(95% UI)           | Mortality rate per<br>100,000<br>(95% UI) | Incidence per<br>1,000<br>(95% UI) | Cases<br>(95% UI)                             |
|------------------------------------|------------------------------|-------------------------------------------|------------------------------------|-----------------------------------------------|
| Canada                             | 1<br>(1-2)                   | 0.1<br>(0.0-0.1)                          | 30.2<br>(17.9-48.5)                | 58,977<br>(34,983-94,549)                     |
| Greenland                          | 0<br>(0-0)                   | 0.3<br>(0.1-0.5)                          | 40.9<br>(24.2-66.2)                | 141<br>(84-229)                               |
| United States                      | 37<br>(28-48)                | 0.2<br>(0.1-0.2)                          | 30.4<br>(19.2-44.8)                | 593,007<br>(375,338-875,292)                  |
| <b>Latin America and Caribbean</b> | <b>1,259<br/>(976-1,595)</b> | <b>2.5<br/>(2.0-3.2)</b>                  | <b>447.0<br/>(307.3-614.1)</b>     | <b>21,138,621<br/>(14,532,864-29,044,618)</b> |
| <b>Caribbean</b>                   | <b>198<br/>(116-328)</b>     | <b>5.0<br/>(2.9-8.2)</b>                  | <b>186.6<br/>(111.4-299.3)</b>     | <b>770,044<br/>(459,648-1,234,977)</b>        |
| Antigua and Barbuda                | 0<br>(0-0)                   | 0.9<br>(0.4-1.7)                          | 323.2<br>(171.0-585.1)             | 1,494<br>(790-2,705)                          |
| The Bahamas                        | 0<br>(0-1)                   | 0.7<br>(0.2-1.6)                          | 273.1<br>(141.4-500.1)             | 8,720<br>(4,517-15,970)                       |
| Barbados                           | 0<br>(0-0)                   | 0.6<br>(0.2-1.3)                          | 260.9<br>(135.9-483.0)             | 4,093<br>(2,132-7,576)                        |
| Belize                             | 1<br>(0-2)                   | 1.6<br>(0.6-3.6)                          | 291.1<br>(159.0-523.2)             | 12,026<br>(6,567-21,613)                      |
| Bermuda                            | 0<br>(0-0)                   | 0.1<br>(0.1-0.2)                          | 282.7<br>(141.9-529.7)             | 1,251<br>(628-2,345)                          |
| Cuba                               | 3<br>(2-4)                   | 0.4<br>(0.3-0.6)                          | 206.4<br>(144.0-296.7)             | 127,330<br>(88,840-183,010)                   |
| Dominica                           | 0<br>(0-0)                   | 1.2<br>(0.6-2.3)                          | 264.2<br>(138.8-485.6)             | 1,429<br>(751-2,625)                          |
| Dominican Republic                 | 34<br>(17-61)                | 3.6<br>(1.9-6.5)                          | 285.1<br>(146.4-535.8)             | 290,107<br>(148,973-545,229)                  |
| Grenada                            | 0<br>(0-0)                   | 0.7<br>(0.3-1.5)                          | 255.5<br>(129.8-473.9)             | 3,048<br>(1,549-5,654)                        |
| Guyana                             | 5<br>(3-9)                   | 8.4<br>(4.8-13.7)                         | 352.1<br>(226.7-524.5)             | 25,135<br>(16,185-37,439)                     |
| Haiti                              | 146<br>(79-260)              | 9.6<br>(5.2-17.1)                         | 119.7<br>(67.1-188.2)              | 181,081<br>(101,472-284,528)                  |
| Jamaica                            | 4<br>(2-8)                   | 1.4<br>(0.6-2.8)                          | 175.1<br>(93.6-314.1)              | 46,862<br>(25,040-84,058)                     |
| Puerto Rico                        | 1<br>(0-1)                   | 0.3<br>(0.2-0.6)                          | 185.7<br>(93.5-358.2)              | 44,635<br>(22,467-86,100)                     |

| Location                         | Deaths<br>(95% UI)       | Mortality rate per<br>100,000<br>(95% UI) | Incidence per<br>1,000<br>(95% UI) | Cases<br>(95% UI)                           |
|----------------------------------|--------------------------|-------------------------------------------|------------------------------------|---------------------------------------------|
| Saint Lucia                      | 0<br>(0-0)               | 0.9<br>(0.3-2.0)                          | 382.4<br>(203.5-688.8)             | 3,828<br>(2,037-6,894)                      |
| Saint Vincent and the Grenadines | 0<br>(0-0)               | 1.7<br>(0.9-3.0)                          | 230.7<br>(148.8-344.6)             | 2,198<br>(1,417-3,283)                      |
| Suriname                         | 2<br>(1-4)               | 4.9<br>(2.4-8.9)                          | 187.9<br>(117.2-293.7)             | 9,914<br>(6,181-15,497)                     |
| Trinidad and Tobago              | 1<br>(0-2)               | 0.9<br>(0.3-2.3)                          | 146.1<br>(77.0-269.4)              | 12,978<br>(6,842-23,922)                    |
| Virgin Islands, U.S.             | 0<br>(0-0)               | 0.2<br>(0.1-0.4)                          | 271.8<br>(139.3-509.7)             | 1,484<br>(761-2,784)                        |
| <b>Andean Latin America</b>      | <b>80<br/>(54-113)</b>   | <b>1.2<br/>(0.8-1.7)</b>                  | <b>256.1<br/>(171.3-353.4)</b>     | <b>1,679,785<br/>(1,123,593-2,318,298)</b>  |
| Bolivia                          | 44<br>(25-73)            | 3.2<br>(1.8-5.3)                          | 437.6<br>(294.3-640.0)             | 584,290<br>(392,939-854,572)                |
| Ecuador                          | 19<br>(11-30)            | 1.1<br>(0.6-1.7)                          | 322.7<br>(195.1-482.5)             | 545,584<br>(329,857-815,742)                |
| Peru                             | 16<br>(9-25)             | 0.5<br>(0.3-0.7)                          | 154.8<br>(98.8-221.6)              | 547,030<br>(349,305-783,048)                |
| <b>Central Latin America</b>     | <b>714<br/>(538-930)</b> | <b>3.1<br/>(2.4-4.1)</b>                  | <b>367.3<br/>(241.6-533.6)</b>     | <b>8,209,712<br/>(5,400,527-11,925,432)</b> |
| Colombia                         | 85<br>(55-125)           | 2.4<br>(1.5-3.5)                          | 656.2<br>(424.6-966.3)             | 2,123,603<br>(1,374,212-3,127,391)          |
| Costa Rica                       | 3<br>(1-5)               | 0.8<br>(0.4-1.6)                          | 441.4<br>(232.0-815.7)             | 143,184<br>(75,262-264,579)                 |
| El Salvador                      | 16<br>(8-28)             | 2.9<br>(1.5-5.2)                          | 550.2<br>(343.4-839.7)             | 257,963<br>(161,013-393,690)                |
| Guatemala                        | 139<br>(94-195)          | 7.0<br>(4.8-9.9)                          | 390.5<br>(256.1-539.9)             | 747,833<br>(490,368-1,033,923)              |
| Honduras                         | 50<br>(29-80)            | 5.3<br>(3.1-8.5)                          | 426.6<br>(275.0-603.1)             | 399,764<br>(257,735-565,116)                |
| Mexico                           | 282<br>(211-364)         | 2.4<br>(1.8-3.1)                          | 203.9<br>(129.6-314.0)             | 2,378,537<br>(1,511,635-3,661,993)          |
| Nicaragua                        | 5<br>(3-9)               | 0.9<br>(0.5-1.4)                          | 66.3<br>(31.1-115.3)               | 40,410<br>(18,937-70,302)                   |
| Panama                           | 16<br>(9-29)             | 4.7<br>(2.5-8.3)                          | 473.3<br>(247.8-858.2)             | 172,145<br>(90,108-312,113)                 |

| Location                            | Deaths<br>(95% UI)             | Mortality rate per<br>100,000<br>(95% UI) | Incidence per<br>1,000<br>(95% UI) | Cases<br>(95% UI)                             |
|-------------------------------------|--------------------------------|-------------------------------------------|------------------------------------|-----------------------------------------------|
| Venezuela                           | 119<br>(78-175)                | 4.1<br>(2.7-6.1)                          | 694.2<br>(441.1-1,019.8)           | 1,965,004<br>(1,248,478-2,886,493)            |
| <b>Tropical Latin America</b>       | <b>267<br/>(205-345)</b>       | <b>1.7<br/>(1.3-2.1)</b>                  | <b>740.1<br/>(522.3-993.0)</b>     | <b>10,553,252<br/>(7,446,877-14,159,709)</b>  |
| Brazil                              | 259<br>(198-335)               | 1.7<br>(1.3-2.2)                          | 734.9<br>(519.3-985.0)             | 10,248,349<br>(7,242,676-13,737,005)          |
| Paraguay                            | 9<br>(5-14)                    | 1.4<br>(0.8-2.3)                          | 976.9<br>(604.1-1,391.2)           | 305,549<br>(188,969-435,157)                  |
| <b>North Africa and Middle East</b> | <b>4,193<br/>(2,714-6,422)</b> | <b>6.6<br/>(4.3-10.2)</b>                 | <b>415.8<br/>(267.4-608.8)</b>     | <b>26,408,211<br/>(16,981,918-38,665,090)</b> |
| Afghanistan                         | 840<br>(412-1,520)             | 16.9<br>(8.3-30.7)                        | 601.6<br>(332.9-1,017.3)           | 2,852,954<br>(1,578,830-4,824,054)            |
| Algeria                             | 43<br>(20-83)                  | 0.9<br>(0.4-1.8)                          | 252.3<br>(142.0-400.8)             | 1,284,098<br>(722,453-2,039,554)              |
| Bahrain                             | 0<br>(0-0)                     | 0.1<br>(0.1-0.3)                          | 251.8<br>(129.7-443.3)             | 24,282<br>(12,503-42,747)                     |
| Egypt                               | 904<br>(463-1,558)             | 8.3<br>(4.2-14.3)                         | 199.9<br>(123.9-297.1)             | 2,390,351<br>(1,481,493-3,552,297)            |
| Iran                                | 156<br>(55-363)                | 1.9<br>(0.7-4.5)                          | 960.4<br>(623.8-1,423.3)           | 6,811,659<br>(4,424,130-10,094,515)           |
| Iraq                                | 312<br>(128-608)               | 4.1<br>(1.7-7.9)                          | 375.9<br>(199.1-614.0)             | 2,783,505<br>(1,474,037-4,546,309)            |
| Jordan                              | 7<br>(4-11)                    | 0.7<br>(0.4-1.1)                          | 390.4<br>(251.3-571.9)             | 374,700<br>(241,231-548,908)                  |
| Kuwait                              | 1<br>(0-1)                     | 0.3<br>(0.1-0.5)                          | 132.5<br>(69.1-226.4)              | 88,254<br>(46,017-150,762)                    |
| Lebanon                             | 2<br>(1-4)                     | 0.6<br>(0.3-1.3)                          | 386.6<br>(214.3-637.3)             | 116,530<br>(64,594-192,120)                   |
| Libya                               | 2<br>(1-4)                     | 0.5<br>(0.2-0.9)                          | 187.6<br>(106.8-296.9)             | 92,288<br>(52,519-146,079)                    |
| Morocco                             | 235<br>(134-390)               | 10.3<br>(5.8-17.0)                        | 475.9<br>(307.9-709.1)             | 1,068,125<br>(690,948-1,591,394)              |
| Palestine                           | 7<br>(3-12)                    | 0.6<br>(0.3-1.1)                          | 356.6<br>(190.9-595.7)             | 381,437<br>(204,199-637,220)                  |
| Oman                                | 1<br>(1-3)                     | 0.3<br>(0.2-0.6)                          | 641.5<br>(406.6-956.8)             | 276,141<br>(175,029-411,882)                  |



| Location                          | Deaths<br>(95% UI)                  | Mortality rate per<br>100,000<br>(95% UI) | Incidence per<br>1,000<br>(95% UI)   | Cases<br>(95% UI)                               |
|-----------------------------------|-------------------------------------|-------------------------------------------|--------------------------------------|-------------------------------------------------|
| Qatar                             | 0<br>(0-0)                          | 0.2<br>(0.1-0.4)                          | 155.6<br>(83.1-280.9)                | 19,720<br>(10,530-35,585)                       |
| Saudi Arabia                      | 7<br>(4-11)                         | 0.3<br>(0.2-0.4)                          | 224.4<br>(147.8-330.5)               | 572,180<br>(376,953-842,879)                    |
| Sudan                             | 532<br>(207-1,173)                  | 12.7<br>(4.9-28.0)                        | 494.9<br>(344.7-693.7)               | 1,827,025<br>(1,272,500-2,561,104)              |
| Syria                             | 5<br>(2-10)                         | 0.3<br>(0.1-0.6)                          | 241.6<br>(127.1-414.8)               | 469,217<br>(246,940-805,803)                    |
| Tunisia                           | 4<br>(2-7)                          | 0.5<br>(0.3-0.9)                          | 307.7<br>(235.3-406.8)               | 285,502<br>(218,380-377,533)                    |
| Turkey                            | 39<br>(21-65)                       | 0.6<br>(0.3-1.1)                          | 257.1<br>(192.2-342.9)               | 1,602,391<br>(1,197,928-2,137,404)              |
| United Arab Emirates              | 1<br>(0-2)                          | 0.1<br>(0.0-0.3)                          | 251.4<br>(130.8-434.7)               | 234,106<br>(121,806-404,747)                    |
| Yemen                             | 1,093<br>(385-2,232)                | 23.6<br>(8.3-48.2)                        | 659.3<br>(359.9-1,180.7)             | 2,978,163<br>(1,625,935-5,333,619)              |
| <b>South Asia</b>                 | <b>13,396<br/>(10,116-17,453)</b>   | <b>8.7<br/>(6.6-11.4)</b>                 | <b>220.1<br/>(156.7-302.9)</b>       | <b>35,169,025<br/>(25,043,003-48,400,337)</b>   |
| Bangladesh                        | 782<br>(477-1,160)                  | 5.5<br>(3.3-8.1)                          | 414.4<br>(333.3-521.0)               | 6,181,744<br>(4,972,575-7,771,426)              |
| Bhutan                            | 3<br>(1-5)                          | 3.6<br>(1.6-6.4)                          | 898.7<br>(619.1-1,233.2)             | 67,965<br>(46,822-93,264)                       |
| India                             | 10,282<br>(7,442-13,730)            | 9.2<br>(6.6-12.2)                         | 194.7<br>(127.0-285.3)               | 22,612,577<br>(14,756,286-33,142,659)           |
| Nepal                             | 160<br>(84-284)                     | 4.0<br>(2.1-7.1)                          | 458.3<br>(377.1-554.5)               | 1,929,159<br>(1,587,098-2,333,911)              |
| Pakistan                          | 2,169<br>(1,411-3,123)              | 9.4<br>(6.1-13.5)                         | 173.0<br>(117.3-241.5)               | 4,228,167<br>(2,865,976-5,902,830)              |
| <b>Sub-Saharan Africa</b>         | <b>104,733<br/>(83,406-128,842)</b> | <b>66.9<br/>(53.3-82.3)</b>               | <b>742.6<br/>(589.0-934.0)</b>       | <b>117,303,716<br/>(93,039,381-147,541,731)</b> |
| <b>Central Sub-Saharan Africa</b> | <b>15,617<br/>(9,981-23,942)</b>    | <b>75.1<br/>(48.0-115.1)</b>              | <b>1,353.4<br/>(1,065.0-1,683.2)</b> | <b>28,733,279<br/>(22,610,651-35,735,936)</b>   |
| Angola                            | 2,004<br>(1,114-3,280)              | 40.8<br>(22.7-66.9)                       | 660.5<br>(476.2-949.4)               | 3,304,069<br>(2,381,788-4,749,019)              |
| Central African Republic          | 1,232                               | 166.0                                     | 1,263.2                              | 999,223                                         |

| Location                          | Deaths<br>(95% UI)                | Mortality rate per<br>100,000<br>(95% UI) | Incidence per<br>1,000<br>(95% UI) | Cases<br>(95% UI)                             |
|-----------------------------------|-----------------------------------|-------------------------------------------|------------------------------------|-----------------------------------------------|
|                                   | (759-1,925)                       | (102.2-259.4)                             | (926.3-1,632.8)                    | (732,760-1,291,601)                           |
| Congo                             | 273<br>(151-461)                  | 36.6<br>(20.2-61.8)                       | 944.9<br>(719.7-1,221.2)           | 704,108<br>(536,255-909,997)                  |
| Democratic Republic of the Congo  | 12,058<br>(6,601-19,978)          | 85.8<br>(47.0-142.1)                      | 1,632.5<br>(1,290.7-2,012.3)       | 23,419,173<br>(18,515,882-28,867,977)         |
| Equatorial Guinea                 | 5<br>(2-10)                       | 5.5<br>(2.5-10.6)                         | 1,062.1<br>(645.2-1,590.1)         | 104,206<br>(63,301-156,012)                   |
| Gabon                             | 44<br>(24-74)                     | 18.1<br>(9.8-30.0)                        | 789.7<br>(578.9-1,033.5)           | 196,075<br>(143,749-256,615)                  |
| <b>Eastern Sub-Saharan Africa</b> | <b>16,300<br/>(13,040-19,805)</b> | <b>26.1<br/>(20.8-31.7)</b>               | <b>432.1<br/>(330.6-560.5)</b>     | <b>26,952,299<br/>(20,623,853-34,965,179)</b> |
| Burundi                           | 1,814<br>(1,084-2,927)            | 84.7<br>(50.6-136.6)                      | 622.2<br>(392.9-924.5)             | 1,316,133<br>(831,106-1,955,556)              |
| Comoros                           | 18<br>(9-34)                      | 19.6<br>(10.1-36.4)                       | 534.7<br>(331.4-810.1)             | 51,972<br>(32,210-78,737)                     |
| Djibouti                          | 19<br>(9-36)                      | 11.1<br>(5.0-21.0)                        | 473.1<br>(284.6-759.4)             | 59,294<br>(35,671-95,189)                     |
| Eritrea                           | 289<br>(158-468)                  | 36.3<br>(19.9-58.8)                       | 523.0<br>(313.9-847.9)             | 392,488<br>(235,534-636,256)                  |
| Ethiopia                          | 2,649<br>(1,716-3,738)            | 17.3<br>(11.2-24.5)                       | 299.1<br>(233.9-372.1)             | 4,419,158<br>(3,455,906-5,496,306)            |
| Kenya                             | 1,404<br>(1,008-1,929)            | 21.4<br>(15.3-29.4)                       | 343.2<br>(228.5-502.3)             | 2,260,592<br>(1,505,105-3,308,791)            |
| Madagascar                        | 1,718<br>(960-2,741)              | 44.2<br>(24.7-70.5)                       | 358.5<br>(220.1-554.3)             | 1,384,649<br>(850,318-2,141,022)              |
| Malawi                            | 1,000<br>(599-1,541)              | 31.2<br>(18.7-48.1)                       | 582.2<br>(375.7-857.7)             | 1,880,469<br>(1,213,479-2,770,214)            |
| Mozambique                        | 1,216<br>(741-1,841)              | 24.5<br>(14.9-37.1)                       | 366.8<br>(282.0-481.4)             | 1,841,770<br>(1,416,213-2,417,525)            |
| Rwanda                            | 650<br>(411-985)                  | 34.7<br>(21.9-52.6)                       | 720.0<br>(571.8-913.5)             | 1,336,002<br>(1,060,959-1,694,960)            |
| Somalia                           | 518<br>(258-930)                  | 39.2<br>(19.6-70.5)                       | 636.2<br>(422.1-909.8)             | 752,300<br>(499,220-1,075,891)                |
| South Sudan                       | 913<br>(443-1,716)                | 31.9<br>(15.5-60.0)                       | 719.9<br>(435.3-1,132.0)           | 2,146,188<br>(1,297,642-3,374,501)            |
| Tanzania                          | 1,224                             | 13.6                                      | 277.0                              | 2,601,351                                     |

| Location                           | Deaths<br>(95% UI)                | Mortality rate per<br>100,000<br>(95% UI) | Incidence per<br>1,000<br>(95% UI) | Cases<br>(95% UI)                             |
|------------------------------------|-----------------------------------|-------------------------------------------|------------------------------------|-----------------------------------------------|
|                                    | (775-1,834)                       | (8.6-20.4)                                | (196.2-389.4)                      | (1,842,554-3,657,017)                         |
| Uganda                             | 2,146<br>(1,442-3,070)            | 28.6<br>(19.2-40.8)                       | 694.1<br>(536.4-883.6)             | 5,238,860<br>(4,048,229-6,669,040)            |
| Zambia                             | 722<br>(466-1,086)                | 25.4<br>(16.4-38.2)                       | 454.8<br>(347.8-571.0)             | 1,283,627<br>(981,617-1,611,551)              |
| <b>Southern Sub-Saharan Africa</b> | <b>1,514<br/>(1,071-2,071)</b>    | <b>17.6<br/>(12.4-24.1)</b>               | <b>237.3<br/>(157.5-342.2)</b>     | <b>2,150,738<br/>(1,427,096-3,101,783)</b>    |
| Botswana                           | 11<br>(5-21)                      | 4.3<br>(2.0-8.0)                          | 77.6<br>(41.6-128.2)               | 21,110<br>(11,324-34,889)                     |
| Lesotho                            | 141<br>(89-218)                   | 54.7<br>(34.4-84.6)                       | 299.1<br>(193.5-443.8)             | 75,510<br>(48,855-112,051)                    |
| Namibia                            | 101<br>(53-163)                   | 30.3<br>(16.0-48.9)                       | 319.2<br>(196.7-477.0)             | 108,721<br>(67,011-162,469)                   |
| South Africa                       | 319<br>(205-489)                  | 6.4<br>(4.1-9.8)                          | 220.5<br>(145.7-318.0)             | 1,191,643<br>(787,473-1,718,763)              |
| Swaziland                          | 75<br>(43-119)                    | 36.0<br>(20.8-56.9)                       | 244.6<br>(150.5-375.0)             | 50,008<br>(30,768-76,668)                     |
| Zimbabwe                           | 866<br>(553-1,266)                | 34.2<br>(21.8-50.0)                       | 271.2<br>(175.6-396.7)             | 702,165<br>(454,567-1,026,910)                |
| <b>Western Sub-Saharan Africa</b>  | <b>71,303<br/>(53,105-91,870)</b> | <b>110.3<br/>(82.2-142.2)</b>             | <b>915.2<br/>(731.2-1,151.4)</b>   | <b>59,763,343<br/>(47,747,505-75,187,780)</b> |
| Benin                              | 1,806<br>(1,094-2,708)            | 94.5<br>(57.3-141.7)                      | 572.8<br>(362.2-861.6)             | 1,118,918<br>(707,444-1,683,010)              |
| Burkina Faso                       | 2,699<br>(1,584-4,248)            | 84.5<br>(49.6-133.0)                      | 1,208.2<br>(962.5-1,549.1)         | 3,888,875<br>(3,098,119-4,986,247)            |
| Cameroon                           | 1,961<br>(1,177-3,059)            | 50.6<br>(30.3-78.9)                       | 904.3<br>(695.7-1,168.9)           | 3,556,390<br>(2,735,863-4,596,857)            |
| Cape Verde                         | 3<br>(2-5)                        | 3.9<br>(2.3-6.0)                          | 411.5<br>(251.3-639.9)             | 30,591<br>(18,683-47,569)                     |
| Chad                               | 4,229<br>(2,693-6,486)            | 160.1<br>(101.9-245.6)                    | 1,114.8<br>(695.8-1,610.1)         | 2,874,413<br>(1,793,880-4,151,413)            |
| Cote d'Ivoire                      | 2,596<br>(1,570-3,947)            | 72.9<br>(44.1-110.9)                      | 636.3<br>(417.5-929.9)             | 2,224,796<br>(1,459,666-3,251,367)            |
| The Gambia                         | 37<br>(23-54)                     | 10.0<br>(6.4-14.7)                        | 176.8<br>(117.4-258.2)             | 64,914<br>(43,103-94,821)                     |
| Ghana                              | 664                               | 15.3                                      | 712.6                              | 3,289,343                                     |

| Location              | Deaths<br>(95% UI)        | Mortality rate per<br>100,000<br>(95% UI) | Incidence per<br>1,000<br>(95% UI) | Cases<br>(95% UI)                     |
|-----------------------|---------------------------|-------------------------------------------|------------------------------------|---------------------------------------|
|                       | (410-1,025)               | (9.4-23.6)                                | (575.1-877.9)                      | (2,654,688-4,052,310)                 |
| Guinea                | 850<br>(476-1,435)        | 41.8<br>(23.4-70.5)                       | 762.8<br>(477.0-1,123.0)           | 1,526,681<br>(954,754-2,247,538)      |
| Guinea-Bissau         | 195<br>(117-293)          | 63.1<br>(37.6-94.7)                       | 799.7<br>(529.4-1,193.4)           | 244,354<br>(161,753-364,629)          |
| Liberia               | 665<br>(401-1,024)        | 93.2<br>(56.3-143.6)                      | 880.9<br>(552.2-1,340.8)           | 625,350<br>(391,992-951,882)          |
| Mali                  | 1,109<br>(694-1,668)      | 35.2<br>(22.0-53.0)                       | 187.2<br>(130.4-268.4)             | 576,676<br>(401,781-826,975)          |
| Mauritania            | 177<br>(110-271)          | 34.4<br>(21.3-52.6)                       | 679.2<br>(438.0-995.6)             | 339,011<br>(218,583-496,915)          |
| Niger                 | 4,160<br>(2,654-6,002)    | 112.9<br>(72.1-162.9)                     | 716.3<br>(573.0-908.9)             | 2,656,642<br>(2,125,232-3,371,236)    |
| Nigeria               | 47,683<br>(31,726-66,272) | 161.5<br>(107.4-224.4)                    | 1,116.0<br>(913.6-1,386.3)         | 33,510,145<br>(27,432,439-41,628,263) |
| Sao Tome and Principe | 5<br>(3-10)               | 16.0<br>(7.6-28.6)                        | 601.8<br>(375.1-918.0)             | 20,796<br>(12,962-31,722)             |
| Senegal               | 903<br>(575-1,317)        | 35.5<br>(22.6-51.8)                       | 613.0<br>(421.6-851.2)             | 1,571,014<br>(1,080,596-2,181,663)    |
| Sierra Leone          | 1,122<br>(676-1,782)      | 107.9<br>(65.0-171.4)                     | 623.1<br>(396.8-983.2)             | 648,546<br>(412,969-1,023,301)        |
| Togo                  | 439<br>(257-694)          | 40.1<br>(23.5-63.4)                       | 885.9<br>(697.8-1,118.2)           | 967,975<br>(762,380-1,221,812)        |

**eTable 5. Deaths averted due to the rotavirus vaccine and remaining avertable deaths if vaccine coverage were 100% in 2016 by GBD region and country.**

| Location                         | Deaths averted                       | Avertable deaths                      |
|----------------------------------|--------------------------------------|---------------------------------------|
| <b>Global</b>                    | <b>28844</b><br><b>(14600-46750)</b> | <b>83158</b><br><b>(36954-168037)</b> |
| <b>High-income</b>               | <b>67</b><br><b>(44-94)</b>          | <b>69</b><br><b>(32-135)</b>          |
| <b>High-income North America</b> | <b>31</b><br><b>(21-42)</b>          | <b>13</b><br><b>(6-23)</b>            |
| Canada                           | 0<br>(0-0)                           | 1<br>(0-2)                            |
| Greenland                        | 0<br>(0-0)                           | 0<br>(0-0)                            |
| United States                    | 31<br>(21-41)                        | 12<br>(6-21)                          |
| <b>Australasia</b>               | <b>4</b><br><b>(2-6)</b>             | <b>1</b><br><b>(0-2)</b>              |
| Australia                        | 3<br>(2-6)                           | 0<br>(0-1)                            |
| New Zealand                      | 0<br>(0-0)                           | 0<br>(0-1)                            |
| <b>High-income Asia Pacific</b>  | <b>0</b><br><b>(0-0)</b>             | <b>8</b><br><b>(4-14)</b>             |
| Brunei                           | 0<br>(0-0)                           | 0<br>(0-0)                            |
| Japan                            | 0<br>(0-0)                           | 6<br>(3-10)                           |
| Singapore                        | 0<br>(0-0)                           | 0<br>(0-0)                            |
| South Korea                      | 0<br>(0-0)                           | 2<br>(1-3)                            |
| <b>Western Europe</b>            | <b>20</b><br><b>(12-34)</b>          | <b>31</b><br><b>(14-64)</b>           |
| Andorra                          | 0<br>(0-0)                           | 0<br>(0-0)                            |
| Austria                          | 1<br>(0-1)                           | 0<br>(0-0)                            |
| Belgium                          | 3<br>(1-5)                           | 0<br>(0-0)                            |
| Cyprus                           | 0<br>(0-0)                           | 0<br>(0-1)                            |
| Denmark                          | 0<br>(0-0)                           | 1<br>(1-2)                            |
| Finland                          | 0<br>(0-1)                           | 0<br>(0-0)                            |
| France                           | 0<br>(0-0)                           | 14<br>(6-27)                          |
| Germany                          | 2<br>(1-3)                           | 3<br>(1-7)                            |
| Greece                           | 0<br>(0-0)                           | 0<br>(0-0)                            |

| Location                                                | Deaths averted                | Avertable deaths              |
|---------------------------------------------------------|-------------------------------|-------------------------------|
| Iceland                                                 | 0<br>(0-0)                    | 0<br>(0-0)                    |
| Ireland                                                 | 0<br>(0-0)                    | 0<br>(0-1)                    |
| Israel                                                  | 4<br>(2-6)                    | 1<br>(0-2)                    |
| Italy                                                   | 0<br>(0-0)                    | 3<br>(2-7)                    |
| Luxembourg                                              | 0<br>(0-0)                    | 0<br>(0-0)                    |
| Malta                                                   | 0<br>(0-0)                    | 0<br>(0-0)                    |
| Netherlands                                             | 0<br>(0-0)                    | 2<br>(1-3)                    |
| Norway                                                  | 0<br>(0-0)                    | 0<br>(0-1)                    |
| Portugal                                                | 0<br>(0-0)                    | 1<br>(0-2)                    |
| Spain                                                   | 0<br>(0-0)                    | 1<br>(0-2)                    |
| Sweden                                                  | 0<br>(0-0)                    | 0<br>(0-1)                    |
| Switzerland                                             | 0<br>(0-0)                    | 1<br>(0-2)                    |
| England                                                 | 4<br>(3-5)                    | 1<br>(1-2)                    |
| Northern Ireland                                        | 1<br>(0-2)                    | 0<br>(0-0)                    |
| Scotland                                                | 1<br>(0-3)                    | 0<br>(0-1)                    |
| Wales                                                   | 1<br>(0-2)                    | 0<br>(0-1)                    |
| <b>Southern Latin America</b>                           | <b>12</b><br><b>(10-12)</b>   | <b>16</b><br><b>(7-33)</b>    |
| Argentina                                               | 12<br>(10-12)                 | 13<br>(6-26)                  |
| Chile                                                   | 0<br>(0-0)                    | 2<br>(1-4)                    |
| Uruguay                                                 | 0<br>(0-0)                    | 1<br>(1-3)                    |
| <b>Central Europe, Eastern Europe, and Central Asia</b> | <b>175</b><br><b>(61-384)</b> | <b>161</b><br><b>(61-405)</b> |
| <b>Eastern Europe</b>                                   | <b>1</b><br><b>(1-1)</b>      | <b>41</b><br><b>(20-84)</b>   |
| Belarus                                                 | 0<br>(0-0)                    | 0<br>(0-1)                    |
| Estonia                                                 | 0<br>(0-0)                    | 0<br>(0-0)                    |
| Latvia                                                  | 0<br>(0-0)                    | 0<br>(0-0)                    |
| Lithuania                                               | 0<br>(0-0)                    | 0<br>(0-0)                    |
| Moldova                                                 | 1                             | 0                             |

| Location               | Deaths averted                | Avertable deaths              |
|------------------------|-------------------------------|-------------------------------|
|                        | (0-1)                         | (0-1)                         |
| Ukraine                | 0<br>(0-0)                    | 4<br>(1-10)                   |
| <b>Central Europe</b>  | <b>0</b><br><b>(0-0)</b>      | <b>19</b><br><b>(9-37)</b>    |
| Albania                | 0<br>(0-0)                    | 0<br>(0-1)                    |
| Bosnia and Herzegovina | 0<br>(0-0)                    | 0<br>(0-1)                    |
| Bulgaria               | 0<br>(0-0)                    | 1<br>(0-3)                    |
| Croatia                | 0<br>(0-0)                    | 0<br>(0-0)                    |
| Czech Republic         | 0<br>(0-0)                    | 1<br>(0-1)                    |
| Hungary                | 0<br>(0-0)                    | 0<br>(0-1)                    |
| Macedonia              | 0<br>(0-0)                    | 1<br>(0-1)                    |
| Montenegro             | 0<br>(0-0)                    | 0<br>(0-0)                    |
| Poland                 | 0<br>(0-0)                    | 2<br>(1-4)                    |
| Romania                | 0<br>(0-0)                    | 12<br>(6-20)                  |
| Russian                | 0<br>(0-0)                    | 37<br>(18-72)                 |
| Serbia                 | 0<br>(0-0)                    | 1<br>(0-2)                    |
| Slovakia               | 0<br>(0-0)                    | 1<br>(0-1)                    |
| Slovenia               | 0<br>(0-0)                    | 0<br>(0-0)                    |
| <b>Central Asia</b>    | <b>174</b><br><b>(60-383)</b> | <b>101</b><br><b>(32-284)</b> |
| Armenia                | 2<br>(1-4)                    | 0<br>(0-0)                    |
| Azerbaijan             | 0<br>(0-0)                    | 20<br>(6-55)                  |
| Georgia                | 1<br>(0-2)                    | 1<br>(0-1)                    |
| Kazakhstan             | 0<br>(0-0)                    | 7<br>(3-16)                   |
| Kyrgyzstan             | 0<br>(0-0)                    | 18<br>(8-36)                  |
| Mongolia               | 0<br>(0-0)                    | 0<br>(0-1)                    |
| Tajikistan             | 130<br>(48-261)               | 41<br>(10-140)                |
| Turkmenistan           | 0<br>(0-0)                    | 13<br>(5-32)                  |
| Uzbekistan             | 41<br>(11-115)                | 0<br>(0-2)                    |

| Location                           | Deaths averted                   | Avertable deaths               |
|------------------------------------|----------------------------------|--------------------------------|
| <b>Latin America and Caribbean</b> | <b>1618</b><br><b>(875-2597)</b> | <b>308</b><br><b>(113-782)</b> |
| <b>Central Latin America</b>       | <b>867</b><br><b>(459-1382)</b>  | <b>176</b><br><b>(73-405)</b>  |
| Colombia                           | 171<br>(79-286)                  | 8<br>(2-27)                    |
| Costa Rica                         | 0<br>(0-0)                       | 2<br>(1-6)                     |
| El Salvador                        | 19<br>(8-34)                     | 3<br>(1-11)                    |
| Guatemala                          | 260<br>(129-422)                 | 16<br>(5-45)                   |
| Honduras                           | 83<br>(34-148)                   | 7<br>(2-24)                    |
| Mexico                             | 244<br>(159-347)                 | 84<br>(42-158)                 |
| Nicaragua                          | 15<br>(4-37)                     | 0<br>(0-1)                     |
| Panama                             | 11<br>(5-21)                     | 6<br>(2-19)                    |
| Venezuela                          | 63<br>(40-87)                    | 49<br>(19-115)                 |
| <b>Andean Latin America</b>        | <b>102</b><br><b>(45-177)</b>    | <b>16</b><br><b>(4-53)</b>     |
| Bolivia                            | 52<br>(22-90)                    | 10<br>(2-32)                   |
| Ecuador                            | 33<br>(15-58)                    | 2<br>(1-9)                     |
| Peru                               | 17<br>(8-29)                     | 4<br>(1-12)                    |
| <b>Caribbean</b>                   | <b>95</b><br><b>(43-169)</b>     | <b>90</b><br><b>(25-269)</b>   |
| Antigua and Barbuda                | 0<br>(0-0)                       | 0<br>(0-0)                     |
| The Bahamas                        | 0<br>(0-0)                       | 0<br>(0-1)                     |
| Barbados                           | 0<br>(0-0)                       | 0<br>(0-0)                     |
| Belize                             | 0<br>(0-0)                       | 1<br>(0-2)                     |
| Bermuda                            | 0<br>(0-0)                       | 0<br>(0-0)                     |
| Cuba                               | 0<br>(0-0)                       | 2<br>(1-4)                     |
| Dominica                           | 0<br>(0-0)                       | 0<br>(0-0)                     |
| Dominican Republic                 | 15<br>(6-29)                     | 16<br>(4-52)                   |
| Grenada                            | 0<br>(0-0)                       | 0<br>(0-0)                     |
| Guyana                             | 10<br>(4-19)                     | 1<br>(0-2)                     |
| Haiti                              | 69                               | 65                             |



| Location                                      | Deaths averted                   | Avertable deaths                  |
|-----------------------------------------------|----------------------------------|-----------------------------------|
|                                               | (32-118)                         | (18-191)                          |
| Jamaica                                       | 0<br>(0-0)                       | 3<br>(1-10)                       |
| Puerto Rico                                   | 1<br>(0-2)                       | 0<br>(0-0)                        |
| Saint Lucia                                   | 0<br>(0-0)                       | 0<br>(0-0)                        |
| Saint Vincent and the Grenadines              | 0<br>(0-0)                       | 0<br>(0-0)                        |
| Suriname                                      | 0<br>(0-0)                       | 2<br>(1-4)                        |
| Trinidad and Tobago                           | 0<br>(0-0)                       | 0<br>(0-2)                        |
| Virgin Islands, U.S.                          | 0<br>(0-0)                       | 0<br>(0-0)                        |
| <b>Tropical Latin America</b>                 | <b>554</b><br><b>(327-869)</b>   | <b>25</b><br><b>(11-55)</b>       |
| Brazil                                        | 549<br>(325-861)                 | 22<br>(10-45)                     |
| Paraguay                                      | 5<br>(3-8)                       | 3<br>(1-10)                       |
| <b>Southeast Asia, East Asia, and Oceania</b> | <b>1410</b><br><b>(855-2162)</b> | <b>2791</b><br><b>(1307-5776)</b> |
| <b>East Asia</b>                              | <b>864</b><br><b>(511-1379)</b>  | <b>190</b><br><b>(72-462)</b>     |
| China                                         | 864<br>(511-1379)                | 56<br>(28-110)                    |
| North Korea                                   | 0<br>(0-0)                       | 132<br>(43-348)                   |
| Taiwan                                        | 0<br>(0-0)                       | 2<br>(1-3)                        |
| <b>Southeast Asia</b>                         | <b>542</b><br><b>(342-775)</b>   | <b>2539</b><br><b>(1217-5139)</b> |
| Cambodia                                      | 0<br>(0-0)                       | 73<br>(27-179)                    |
| Indonesia                                     | 0<br>(0-0)                       | 1523<br>(883-2523)                |
| Laos                                          | 0<br>(0-0)                       | 252<br>(72-696)                   |
| Malaysia                                      | 0<br>(0-0)                       | 6<br>(2-13)                       |
| Maldives                                      | 0<br>(0-0)                       | 0<br>(0-0)                        |
| Mauritius                                     | 1<br>(0-1)                       | 0<br>(0-1)                        |
| Myanmar                                       | 0<br>(0-0)                       | 247<br>(75-672)                   |
| Philippines                                   | 541<br>(341-774)                 | 341<br>(122-825)                  |
| Sri Lanka                                     | 0<br>(0-0)                       | 2<br>(1-6)                        |
| Seychelles                                    | 0<br>(0-0)                       | 0<br>(0-0)                        |

| Location                            | Deaths averted                   | Avertable deaths                 |
|-------------------------------------|----------------------------------|----------------------------------|
| Thailand                            | 0<br>(0-0)                       | 19<br>(8-39)                     |
| Timor-Leste                         | 0<br>(0-0)                       | 41<br>(14-105)                   |
| Vietnam                             | 0<br>(0-0)                       | 34<br>(13-79)                    |
| <b>Oceania</b>                      | <b>5</b><br><b>(2-8)</b>         | <b>63</b><br><b>(18-175)</b>     |
| American Samoa                      | 0<br>(0-0)                       | 0<br>(0-0)                       |
| Federated States of Micronesia      | 0<br>(0-0)                       | 0<br>(0-0)                       |
| Fiji                                | 4<br>(1-7)                       | 1<br>(0-3)                       |
| Guam                                | 0<br>(0-0)                       | 0<br>(0-0)                       |
| Kiribati                            | 1<br>(0-2)                       | 1<br>(0-2)                       |
| Marshall Islands                    | 0<br>(0-0)                       | 0<br>(0-0)                       |
| Northern Mariana Islands            | 0<br>(0-0)                       | 0<br>(0-0)                       |
| Papua New Guinea                    | 0<br>(0-0)                       | 55<br>(16-154)                   |
| Samoa                               | 0<br>(0-0)                       | 0<br>(0-0)                       |
| Solomon Islands                     | 0<br>(0-0)                       | 4<br>(1-10)                      |
| Tonga                               | 0<br>(0-0)                       | 0<br>(0-0)                       |
| Vanuatu                             | 0<br>(0-0)                       | 2<br>(0-4)                       |
| <b>North Africa and Middle East</b> | <b>1220</b><br><b>(403-2638)</b> | <b>2502</b><br><b>(655-7481)</b> |
| Afghanistan                         | 0<br>(0-0)                       | 642<br>(182-1792)                |
| Algeria                             | 0<br>(0-0)                       | 33<br>(9-101)                    |
| Bahrain                             | 0<br>(0-1)                       | 0<br>(0-0)                       |
| Egypt                               | 0<br>(0-0)                       | 690<br>(238-1677)                |
| Iran                                | 0<br>(0-0)                       | 119<br>(30-375)                  |
| Iraq                                | 93<br>(27-199)                   | 167<br>(31-554)                  |
| Jordan                              | 8<br>(4-12)                      | 2<br>(0-5)                       |
| Kuwait                              | 0<br>(0-0)                       | 1<br>(0-2)                       |
| Lebanon                             | 0<br>(0-0)                       | 2<br>(0-5)                       |
| Libya                               | 5                                | 0                                |

| Location                           | Deaths averted                       | Avertable deaths                      |
|------------------------------------|--------------------------------------|---------------------------------------|
|                                    | (1-13)                               | (0-1)                                 |
| Morocco                            | 426<br>(167-863)                     | 28<br>(7-94)                          |
| Palestine                          | 0<br>(0-0)                           | 5<br>(1-15)                           |
| Oman                               | 0<br>(0-0)                           | 1<br>(0-3)                            |
| Qatar                              | 0<br>(0-1)                           | 0<br>(0-0)                            |
| Saudi Arabia                       | 12<br>(5-24)                         | 1<br>(0-2)                            |
| Sudan                              | 299<br>(92-680)                      | 217<br>(43-764)                       |
| Syria                              | 0<br>(0-0)                           | 4<br>(1-12)                           |
| Tunisia                            | 0<br>(0-0)                           | 3<br>(1-7)                            |
| Turkey                             | 0<br>(0-0)                           | 30<br>(11-66)                         |
| United Arab Emirates               | 2<br>(0-5)                           | 0<br>(0-1)                            |
| Yemen                              | 373<br>(106-839)                     | 558<br>(99-2004)                      |
| <b>South Asia</b>                  | <b>147</b><br><b>(94-208)</b>        | <b>10093</b><br><b>(5172-18121)</b>   |
| Bangladesh                         | 0<br>(0-0)                           | 598<br>(268-1177)                     |
| Bhutan                             | 0<br>(0-0)                           | 2<br>(1-6)                            |
| India                              | 147<br>(94-208)                      | 7712<br>(4169-13324)                  |
| Nepal                              | 0<br>(0-0)                           | 122<br>(42-290)                       |
| Pakistan                           | 0<br>(0-0)                           | 1659<br>(692-3324)                    |
| <b>Sub-Saharan Africa</b>          | <b>24206</b><br><b>(12268-38666)</b> | <b>67234</b><br><b>(29614-135336)</b> |
| <b>Southern Sub-Saharan Africa</b> | <b>1686</b><br><b>(833-2589)</b>     | <b>409</b><br><b>(128-1113)</b>       |
| Botswana                           | 23<br>(7-46)                         | 1<br>(0-6)                            |
| Lesotho                            | 0<br>(0-0)                           | 108<br>(46-224)                       |
| Namibia                            | 69<br>(34-106)                       | 36<br>(9-101)                         |
| South Africa                       | 316<br>(164-512)                     | 85<br>(28-221)                        |
| Swaziland                          | 68<br>(44-61)                        | 22<br>(4-76)                          |
| Zimbabwe                           | 1210<br>(584-1864)                   | 157<br>(41-485)                       |
| <b>Western Sub-Saharan Africa</b>  | <b>9827</b><br><b>(5285-14768)</b>   | <b>48660</b><br><b>(22281-94596)</b>  |

| Location                          | Deaths averted                      | Avertable deaths                   |
|-----------------------------------|-------------------------------------|------------------------------------|
| Benin                             | 0<br>(0-0)                          | 1380<br>(544-2982)                 |
| Burkina Faso                      | 2797<br>(1492-4070)                 | 689<br>(206-1973)                  |
| Cameroon                          | 1202<br>(646-1812)                  | 753<br>(265-1837)                  |
| Cape Verde                        | 0<br>(0-0)                          | 2<br>(1-5)                         |
| Chad                              | 0<br>(0-0)                          | 3235<br>(1309-6942)                |
| Cote d'Ivoire                     | 922<br>(486-1463)                   | 1301<br>(429-3218)                 |
| The Gambia                        | 33<br>(17-51)                       | 11<br>(3-29)                       |
| Ghana                             | 877<br>(454-1335)                   | 130<br>(39-366)                    |
| Guinea                            | 0<br>(0-0)                          | 649<br>(218-1642)                  |
| Guinea-Bissau                     | 118<br>(60-188)                     | 76<br>(24-194)                     |
| Liberia                           | 117<br>(64-183)                     | 408<br>(149-952)                   |
| Mali                              | 208<br>(120-310)                    | 671<br>(251-1524)                  |
| Mauritania                        | 35<br>(19-58)                       | 106<br>(39-251)                    |
| Niger                             | 1740<br>(1044-2360)                 | 1955<br>(715-4356)                 |
| Nigeria                           | 0<br>(0-0)                          | 36428<br>(17817-66032)             |
| Sao Tome and Principe             | 3<br>(1-5)                          | 2<br>(1-7)                         |
| Senegal                           | 852<br>(426-1442)                   | 252<br>(80-655)                    |
| Sierra Leone                      | 667<br>(321-1091)                   | 439<br>(134-1197)                  |
| Togo                              | 256<br>(136-401)                    | 174<br>(57-432)                    |
| <b>Eastern Sub-Saharan Africa</b> | <b>11580</b><br><b>(5538-19647)</b> | <b>6976</b><br><b>(2673-16128)</b> |
| Burundi                           | 2544<br>(1097-4348)                 | 327<br>(76-1114)                   |
| Comoros                           | 0<br>(0-0)                          | 14<br>(4-38)                       |
| Djibouti                          | 8<br>(3-16)                         | 9<br>(2-29)                        |
| Eritrea                           | 673<br>(221-1506)                   | 19<br>(3-77)                       |
| Ethiopia                          | 584<br>(424-711)                    | 1545<br>(661-2998)                 |
| Kenya                             | 1103<br>(654-1682)                  | 455<br>(208-916)                   |
| Madagascar                        | 1119                                | 636                                |

| Location                          | Deaths averted                   | Avertable deaths                    |
|-----------------------------------|----------------------------------|-------------------------------------|
|                                   | (512-1885)                       | (177-1797)                          |
| Malawi                            | 1394<br>(605-2554)               | 181<br>(52-532)                     |
| Mozambique                        | 545<br>(305-787)                 | 553<br>(198-1277)                   |
| Rwanda                            | 1358<br>(566-2628)               | 57<br>(14-178)                      |
| Somalia                           | 0<br>(0-0)                       | 396<br>(125-1076)                   |
| South Sudan                       | 0<br>(0-0)                       | 700<br>(205-1921)                   |
| Tanzania                          | 1534<br>(762-2465)               | 255<br>(68-755)                     |
| Uganda                            | 0<br>(0-0)                       | 1639<br>(817-2937)                  |
| Zambia                            | 719<br>(388-1062)                | 192<br>(63-483)                     |
| <b>Central Sub-Saharan Africa</b> | <b>1113</b><br><b>(613-1663)</b> | <b>11188</b><br><b>(4533-23499)</b> |
| Angola                            | 976<br>(536-1466)                | 874<br>(256-2315)                   |
| Central African Republic          | 0<br>(0-0)                       | 942<br>(414-1889)                   |
| Congo                             | 137<br>(77-197)                  | 117<br>(38-291)                     |
| Democratic Republic of the Congo  | 0<br>(0-0)                       | 9217<br>(3811-18915)                |
| Equatorial Guinea                 | 0<br>(0-0)                       | 4<br>(1-12)                         |
| Gabon                             | 0<br>(0-0)                       | 34<br>(12-77)                       |

# Rotavirus

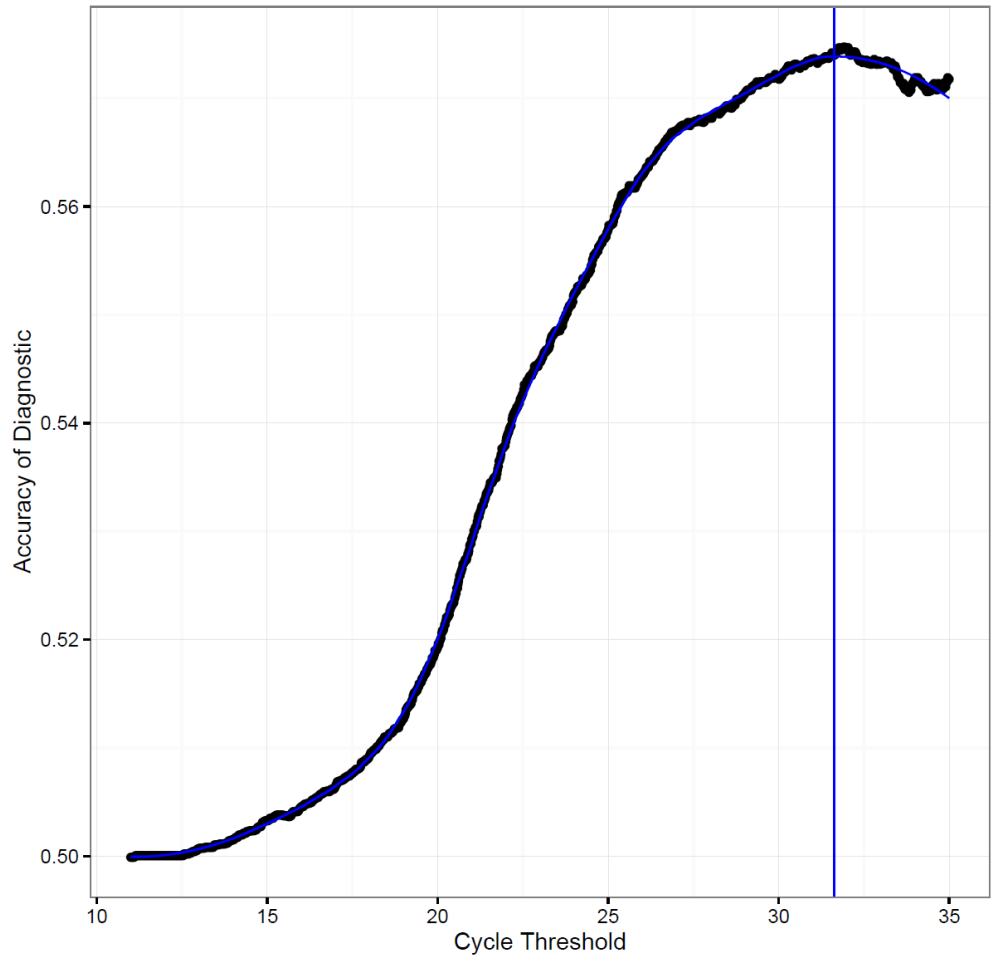

**eFigure 1. Data coverage maps.**

A) Shows the number of unique sources providing data in the rotavirus model and B) shows the number of diarrhea samples from the data sources (i.e. the population sample size of the data). The data shown detail the proportion of diarrhea episodes where rotavirus is present.

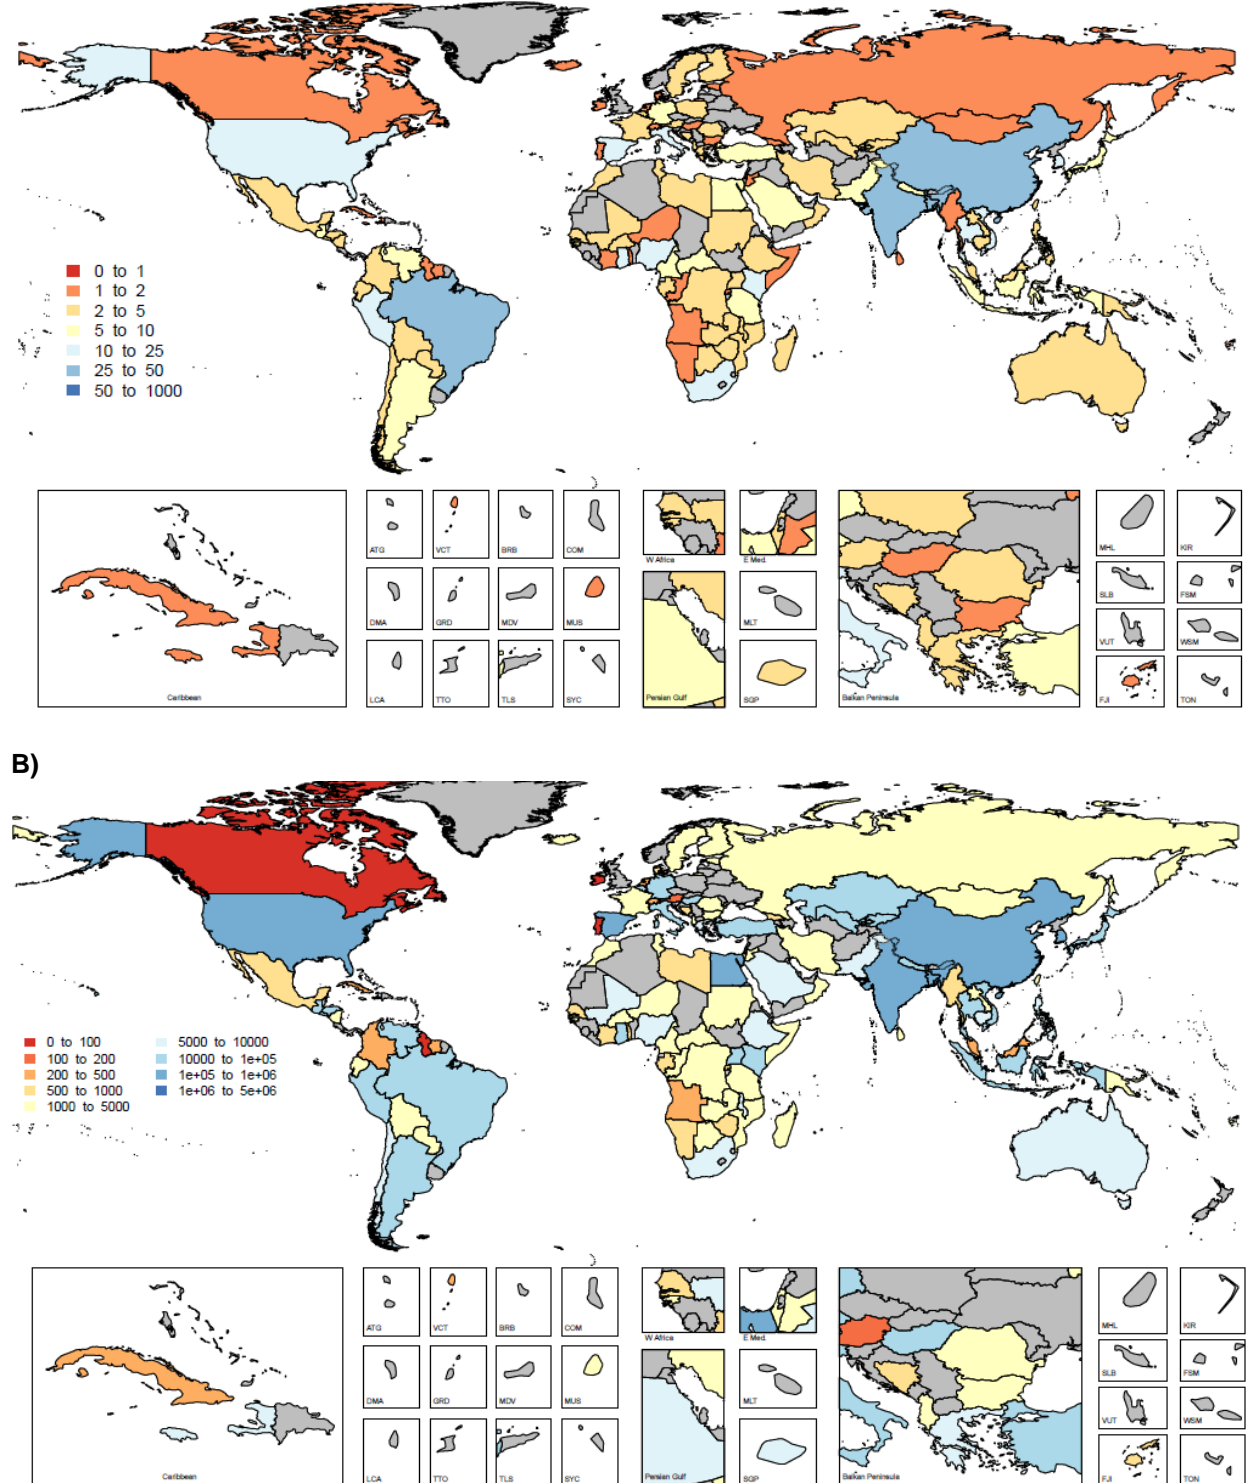

## eFigure 2. Diagnostic ability to discriminate cases and controls of qPCR.

The modeling strategy requires that the continuous qPCR test results are dichotomized into positive and negative results so that the odds represent the strength of association between rotavirus and diarrhea. The ability to discriminate a stool sample as either a case or control, termed the diagnostic accuracy, of the quantitative PCR (qPCR) array for rotavirus is shown where the relative quantity of rotavirus in a stool sample decreases from left to right. The accuracy is the proportion of stool samples that are correctly classified as case or control. We defined a cutoff point for the presence of rotavirus as the point where the diagnostic accuracy is maximized (blue line).

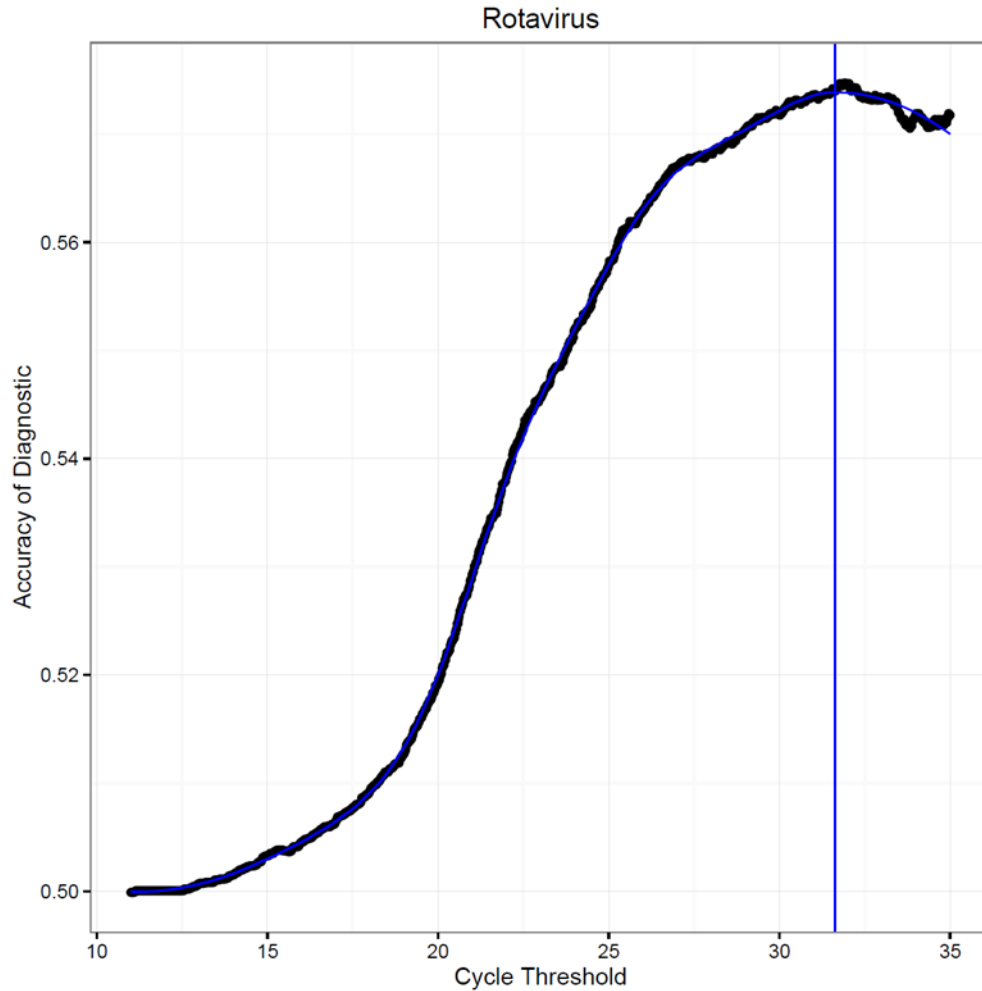



**eFigure 3. Modeled rotavirus vaccine coverage among children under 5 in 2016.**

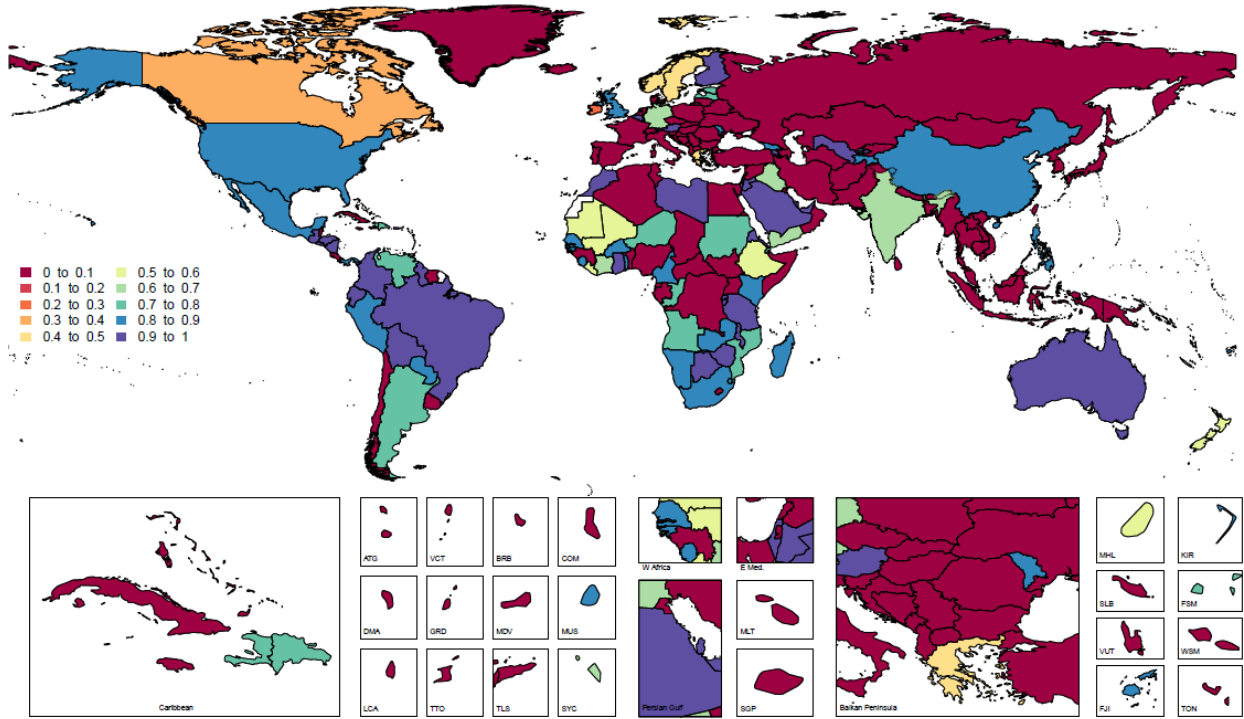

**eFigure 4. Modeled number of under 5 deaths averted due to rotavirus vaccine in 2016.**

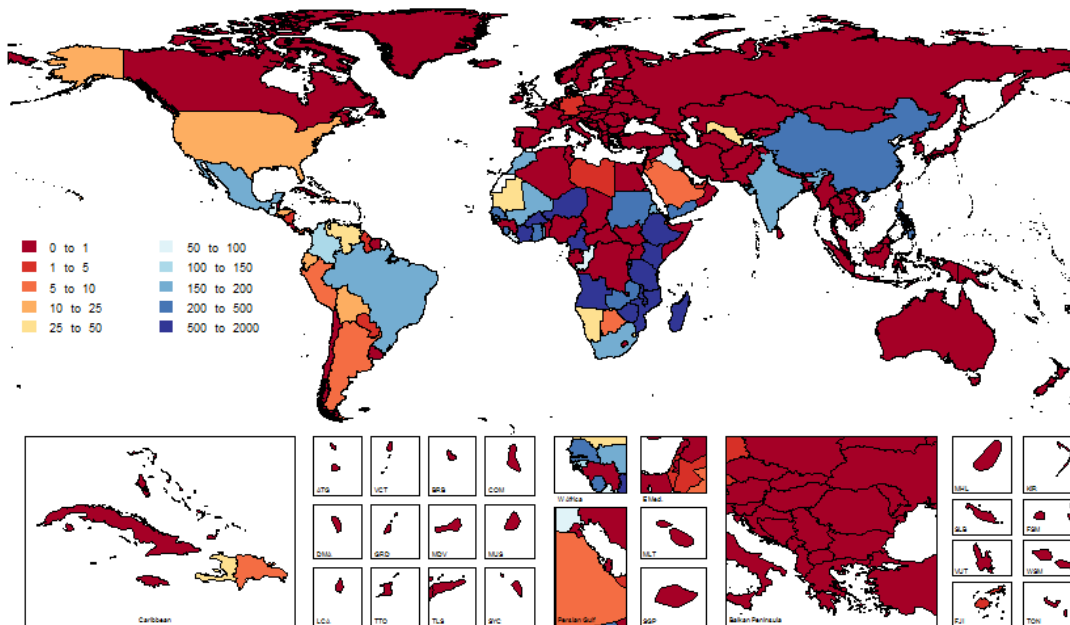

**eFigure 5. A comparison of the number of deaths and PAFs due to rotaviral diarrhea in GBD 2015 and GBD 2016 in all ages and children under-5.**

The axes are on a log10 scale and locations are labeled with the iso3 code (see Supplementary Table 2) and colored to represent GBD regions.

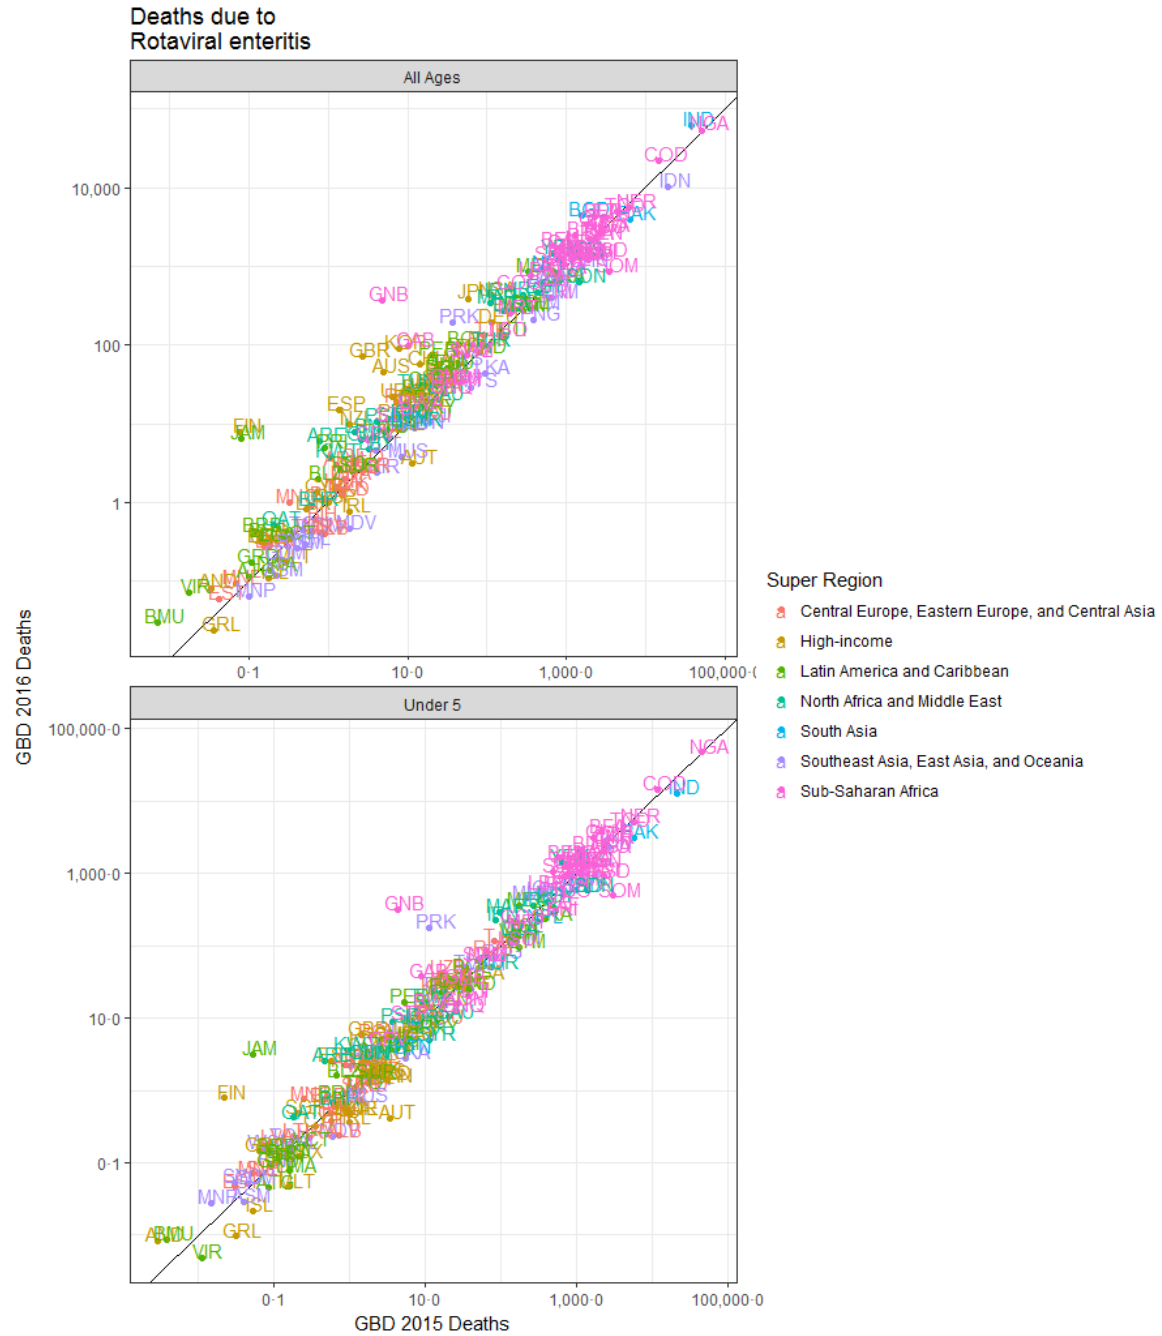

PAF due to Rotaviral enteritis

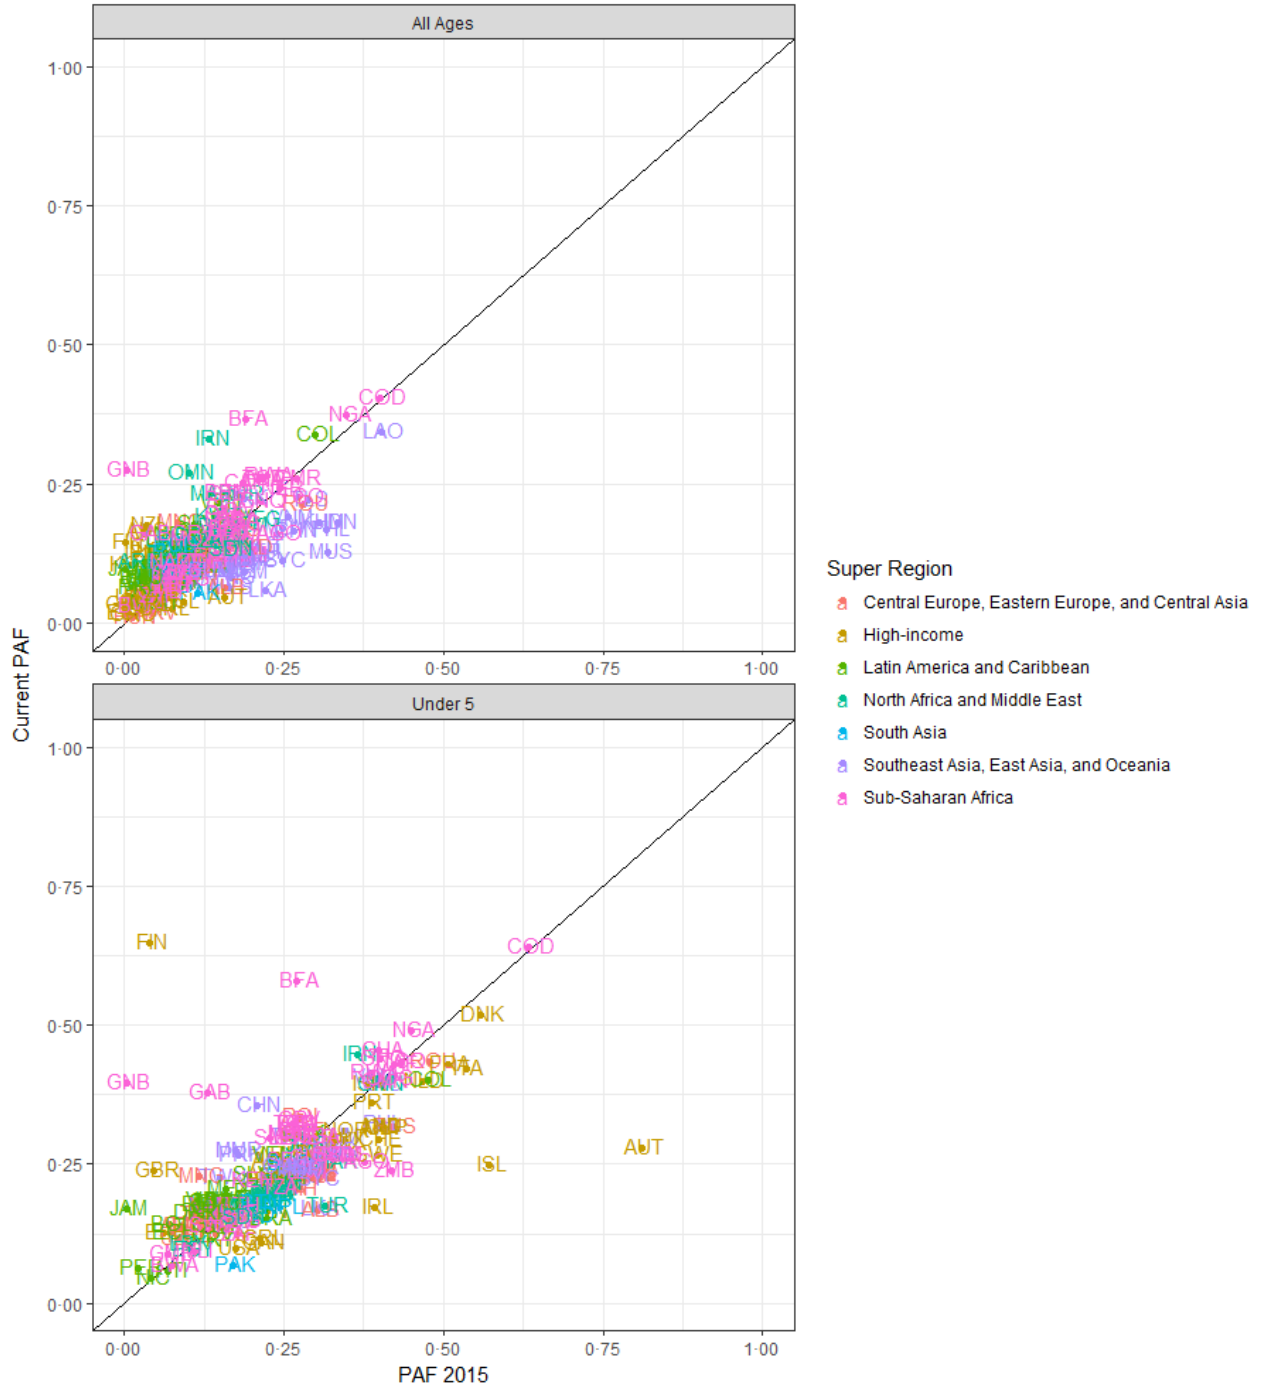

**eFigure 6. Visualizing uncertainty around PAF estimates.**

These plots show the standard error of the distribution of PAF draws by region and rotavirus burden.

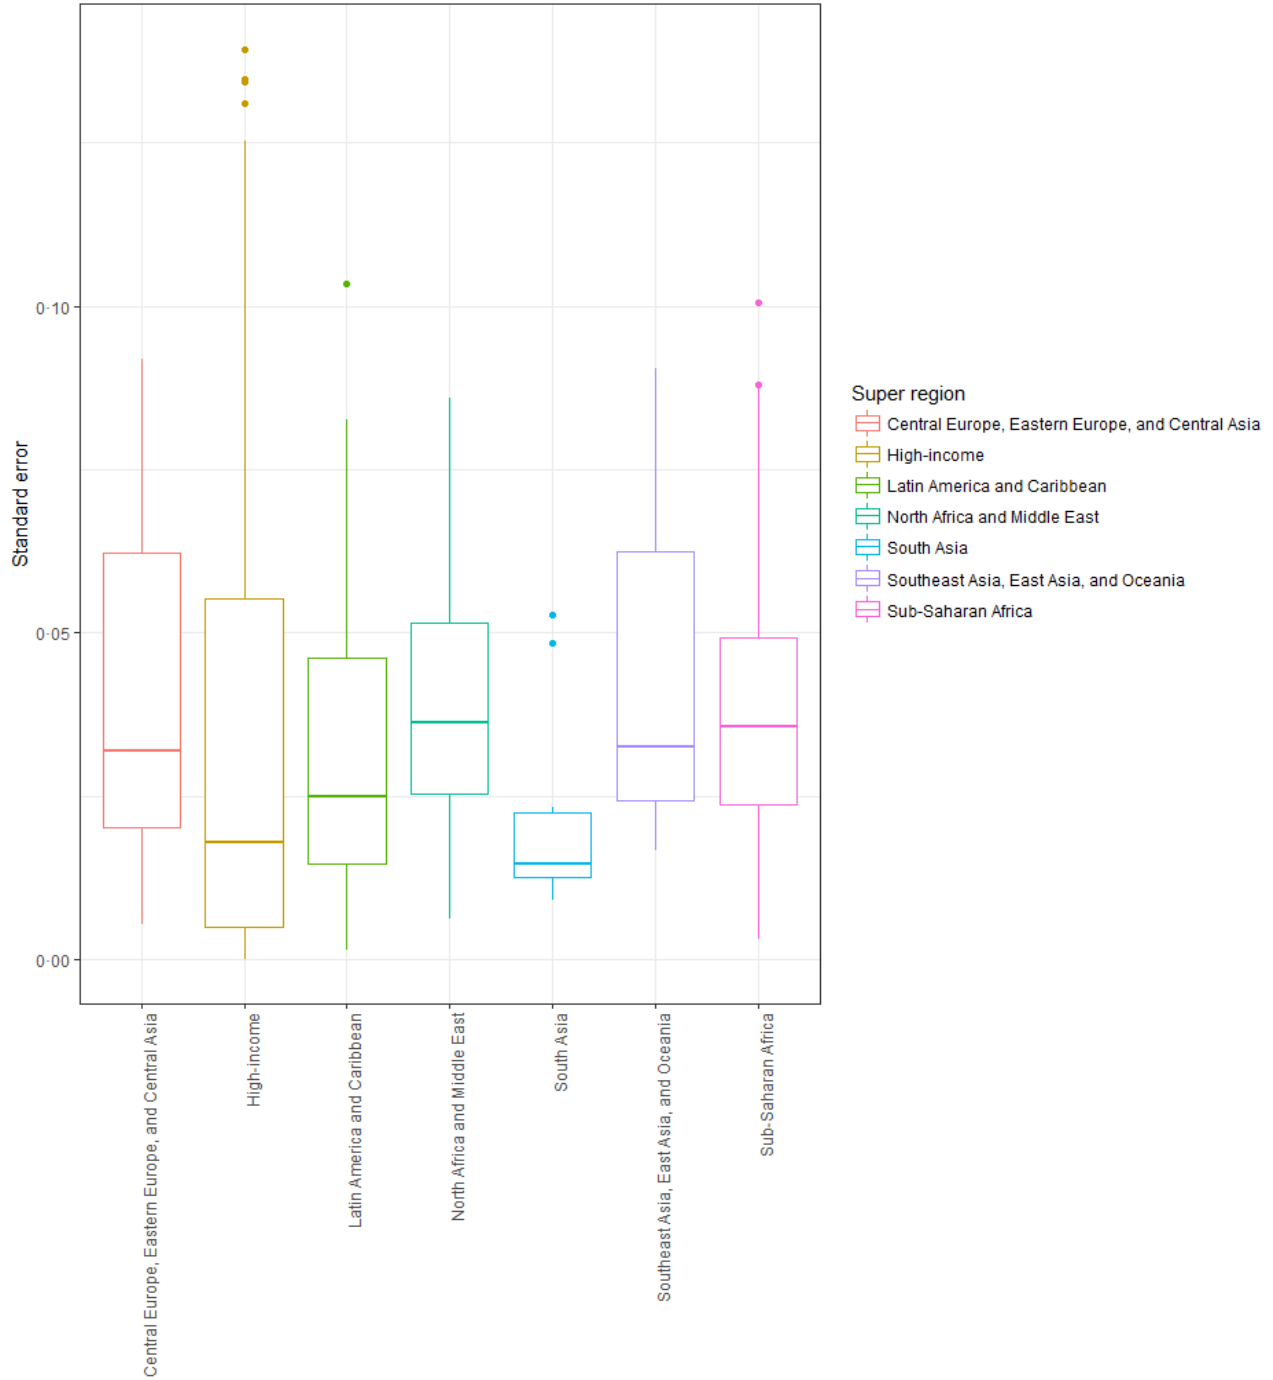

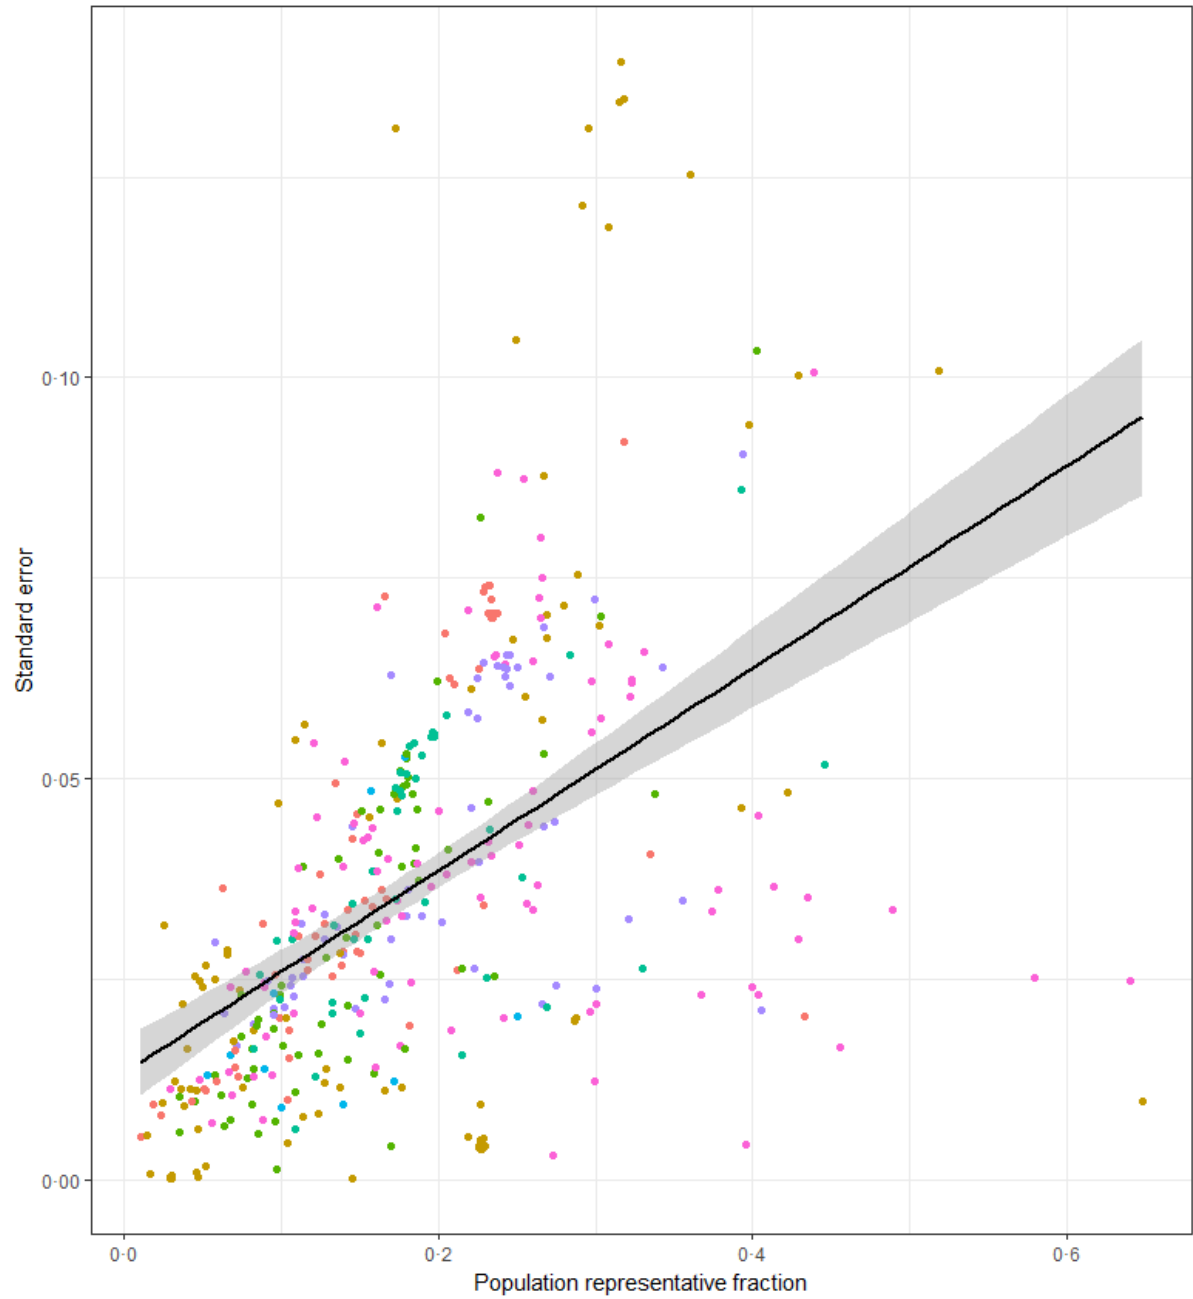

Supplement: jamapediatr-172-958-s001.pdf [file jamapediatr-172-958-s001.pdf]
